# Supplementary material for: Travel-Related Antimicrobial Resistance: A Systematic Review
Source: MDPI journal article supplement (doi:10.3390/tropicalmed6010011), 2021-01-16
Supplement: s1 [file s1]

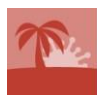

Supplementary Materials

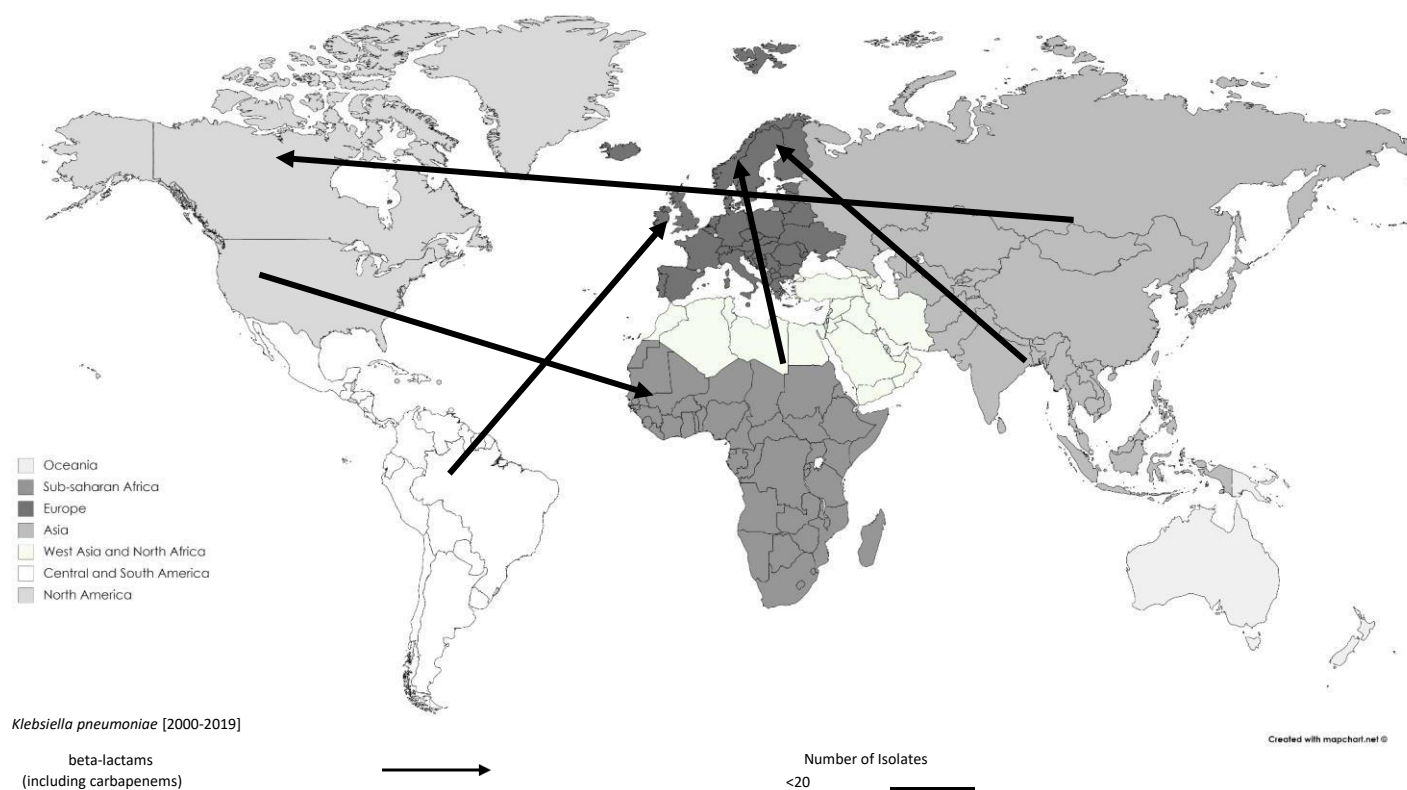

**Figure S1.** Travel-related antimicrobial resistant *Klebsiella pneumoniae* movements, 2000–2019. Data shown by arrows representing antimicrobial resistant (AMR) isolate movements, where the arrowhead represents the destination and the base of the arrow represents the source. Thus, double headed arrows represent movements between the same regions. Different regions are represented with different shades.

**Table S1.** List of the included studies in the review.

| Publication year | First Author's last name | Title                                                                                                       | Listed reduced sensitivity species                                                                                     | Reported reduced sensitivity or resistant antimicrobials                                                               | Travelling from               | Travelling to  | Assessment Score # |
|------------------|--------------------------|-------------------------------------------------------------------------------------------------------------|------------------------------------------------------------------------------------------------------------------------|------------------------------------------------------------------------------------------------------------------------|-------------------------------|----------------|--------------------|
| 1989             | Parsonnet [194]          | Shigella dysenteriae type 1 infections in US travellers to Mexico, 1988                                     | Shigella dysenteriae                                                                                                   | tetracycline, sulfafurazole, streptomycin, trimethoprim, TMP-SMZ, ampicillin and chloramphenicol                       | Mexico                        | USA            | C                  |
| 1990             | Murray [177] +,*         | Emergence of resistant faecal Escherichia coli in travellers not taking prophylactic antimicrobial agents   | Escherichia coli                                                                                                       | trimethoprim, ampicillin, chloramphenicol, gentamicin, kanamycin, streptomycin, sulfonamides, tetracycline and TMP-SMZ | USA and Mexico                | Mexico and USA | B                  |
| 1990             | Tauxe [238]              | Antimicrobial resistance of Shigella isolates in the USA: The importance of international travelers         | Shigella spp.                                                                                                          | ampicillin, chloramphenicol, streptomycin, sulfisoxazole, tetracycline and TMP-SMZ                                     | Unspecified                   | USA            | A                  |
| 1993             | Bourgeois [59]           | Etiology of acute diarrhea among United States military personnel deployed to South America and west Africa | Escherichia coli, Salmonella spp., Shigella spp., Campylobacter spp., Aeromonas spp., Plesiomonas spp. and Vibrio spp. | ampicillin, TMP-SMZ and tetracycline                                                                                   | West Africa and South America | USA            | C                  |

|      |               |                                                                                                                               |                                                                        |                                                                                                                                                                             |                                                                                                                  |           |   |
|------|---------------|-------------------------------------------------------------------------------------------------------------------------------|------------------------------------------------------------------------|-----------------------------------------------------------------------------------------------------------------------------------------------------------------------------|------------------------------------------------------------------------------------------------------------------|-----------|---|
| 1993 | Cohen [72]    | Colonization by enteroaggregative Escherichia coli in travelers with and without diarrhea                                     | Escherichia coli                                                       | TMP-SMZ                                                                                                                                                                     | Central America, South America, The Caribbean or Mexico                                                          | USA       | A |
| 1994 | Oh [186]      | Multidrug-resistant Typhoid Fever in Singapore                                                                                | Salmonella enterica serotype Typhi                                     | chloramphenicol, ampicillin and TMP-SMZ                                                                                                                                     | Bangladesh and India                                                                                             | Singapore | B |
| 1994 | Vila [246]    | Antimicrobial resistance of Shigella isolates causing Traveller's Diarrhea                                                    | Shigella sonnei and Shigella flexneri                                  | ampicillin, chloramphenicol, TMP-SMZ, tetracycline and cephalothin                                                                                                          | East Africa, North Africa, West Africa, East Asia, Southeast Asia, South Asia, South America and Central America | Spain     | B |
| 1997 | Ohtaka [187]  | Epidemiological approach to the prevention of imported infectious diseases in the age of globalization                        | Shigella (flexneri, boydii, sonnei and dysenteriae) and Vibrio cholera | ampicillin, streptomycin, erythromycin, tetracycline, ciprofloxacin and TMP-SMZ                                                                                             | India, Thailand and unspecified                                                                                  | Japan     | C |
| 1998 | Harnett [106] | Molecular characterization of multiresistant strains of Salmonella typhi from South Asia isolated in Ontario, Canada          | Salmonella enterica serotype Paratyphi A and Typhi                     | ampicillin, chloramphenicol, tetracycline, trimethoprim, ticarcillin, piperacillin, TMP-SMZ, streptomycin, sulfamethoxazole, cephalothin, nitrofurantoin and nalidixic acid | Bangladesh, India, Pakistan and Sri Lanka                                                                        | Canada    | C |
| 1998 | Mermin [170]  | Typhoid Fever in the United States, 1985-1994: changing risks of international travel and increasing antimicrobial resistance | Salmonella enterica serotype Typhi                                     | ampicillin, chloramphenicol and TMP-SMZ                                                                                                                                     | Bangladesh, India, Myanmar, Pakistan, Sri Lanka and Central America                                              | USA       | B |

|      |                |                                                                                                                                                                        |                                                                                                                               |                                                                                                                                                          |                                                                                                                                                                      |                 |   |
|------|----------------|------------------------------------------------------------------------------------------------------------------------------------------------------------------------|-------------------------------------------------------------------------------------------------------------------------------|----------------------------------------------------------------------------------------------------------------------------------------------------------|----------------------------------------------------------------------------------------------------------------------------------------------------------------------|-----------------|---|
| 2000 | Ackers [33]    | Laboratory-based surveillance of Salmonella serotype Typhi infections in the United States                                                                             | Salmonella enterica serotype Typhi                                                                                            | nalidixic acid, ampicillin, chloramphenicol streptomycin, tetracycline, sulfafurazole and TMP-SMZ                                                        | Bangladesh, Haiti, India, Netherlands, Pakistan, Philippines, Turkey, UK and Vietnam                                                                                 | USA             | B |
| 2000 | Daniels [75] * | Traveler's diarrhea at sea: Three outbreaks of waterborne enterotoxigenic Escherichia coli on cruise ships                                                             | Escherichia coli                                                                                                              | ampicillin, amoxicillin/clavulanic acid, chloramphenicol, streptomycin, sulfafurazole, TMP-SMZ and tetracycline                                          | Jamaica and Mexico                                                                                                                                                   | USA and Jamaica | C |
| 2000 | Vila [248]     | Quinolone resistance in enterotoxigenic Escherichia coli causing diarrhea in travelers to India in comparison with other geographical areas                            | Escherichia coli                                                                                                              | ampicillin, amoxicillin/clavulanic acid, chloramphenicol, ciprofloxacin, nalidixic acid, tetracycline and TMP-SMZ                                        | India and unspecified                                                                                                                                                | Spain           | C |
| 2001 | Hakanen [103]  | Reduced Fluoroquinolone susceptibility in Salmonella enterica serotypes in travelers returning from Southeast Asia                                                     | Salmonella enterica spp. (Including serotypes Enteritidis, Typhimurium, Hadar, Virchow, Newport, Infantis, Anatum and Panama) | ciprofloxacin, tetracycline, sulfamethoxazole, ampicillin, trimethoprim streptomycin and chloramphenicol                                                 | Cyprus, Dominican Republic, Estonia, Greece, India, Indonesia, Israel, Kenya, Malaysia, Morocco, Russia, Spain, Sri Lanka, Thailand, Tunisia, Turkey and unspecified | Finland         | B |
| 2001 | Huang [117] *  | Emergence of trimethoprim-resistant Escherichia coli in healthy persons in the absence of prophylactic or therapeutic antibiotics during travel to Guadalajara, Mexico | Escherichia coli                                                                                                              | ampicillin, azithromycin, chloramphenicol, ciprofloxacin, doxycycline, erythromycin, furazolidone, levofloxacin, trimethoprim, TMP-SMZ and trovafloxacin | Mexico                                                                                                                                                               | USA             | C |

|      |                                                                   |                                                                                                                                                              |                                                                                                                        |                                                                                                                                                    |                                                                                                                                 |               |   |
|------|-------------------------------------------------------------------|--------------------------------------------------------------------------------------------------------------------------------------------------------------|------------------------------------------------------------------------------------------------------------------------|----------------------------------------------------------------------------------------------------------------------------------------------------|---------------------------------------------------------------------------------------------------------------------------------|---------------|---|
| 2001 | Vila [249]                                                        | Susceptibility patterns of enteroaggregative Escherichia coli associated with travellers' diarrhoea: Emergence of quinolone resistance                       | Escherichia coli                                                                                                       | nalidixic acid, ampicillin, chloramphenicol, tetracycline, TMP-SMZ and ciprofloxacin                                                               | India and Central America                                                                                                       | Spain         | C |
| 2002 | The Campylobacter Sentinel Surveillance Scheme Collaborators [65] | Ciprofloxacin resistance in Campylobacter jejuni: Case–case analysis as a tool for elucidating risks at home and abroad                                      | Campylobacter jejuni                                                                                                   | ciprofloxacin                                                                                                                                      | Cyprus, France, Kenya, Mauritius, Morocco, Portugal, South Africa, Spain, Tanzania, Tunisia, Turkey and unspecified             | UK            | B |
| 2002 | Jiang [130] *                                                     | Prevalence of enteric pathogens among international travelers with diarrhea acquired in Kenya (Mombasa), India (Goa), or Jamaica (Montego Bay)               | Aeromonas spp., Campylobacter spp., Escherichia coli, Plesiomonas spp., Salmonella spp., Shigella spp. and Vibrio spp. | ampicillin, chloramphenicol, doxycycline, furazolidone, gentamycin, ofloxacin, streptomycin, sulfisoxazole, tetracycline, trimethoprim and TMP-SMZ | India, Jamaica and Kenya                                                                                                        | Not mentioned | B |
| 2003 | Hakanen [102]                                                     | Fluoroquinolone resistance in Campylobacter jejuni isolates in travelers returning to Finland: Association of ciprofloxacin resistance to travel destination | Campylobacter jejuni                                                                                                   | ciprofloxacin                                                                                                                                      | Australia, India, Portugal, Spain, Thailand, Tunisia, Turkey, Asia, Africa, Europe and America                                  | Finland       | C |
| 2003 | Vila [247]                                                        | Aeromonas spp. and Traveler's Diarrhea: Clinical features and antimicrobial resistance                                                                       | Aeromonas caviae and veronica biotype sorbia                                                                           | ampicillin, cefotaxime, chloramphenicol, ciprofloxacin, nalidixic acid, tetracycline and TMP-SMZ                                                   | Burkina Faso, Guatemala, India, Iran, Kenya, Mali, Mexico, Nepal, Nicaragua, Paraguay, Senegal, Thailand and Sub-Saharan Africa | Spain         | C |

|      |                  |                                                                                                                                                 |                                                                                                                                         |                                                                                                                |                                                                                                         |         |   |
|------|------------------|-------------------------------------------------------------------------------------------------------------------------------------------------|-----------------------------------------------------------------------------------------------------------------------------------------|----------------------------------------------------------------------------------------------------------------|---------------------------------------------------------------------------------------------------------|---------|---|
| 2004 | Cabrera [63]     | Mechanism of resistance to several antimicrobial agents in Salmonella Clinical isolates causing traveler's diarrhea                             | Salmonella enterica spp. (Including serotypes Enteritidis, Goldcoast, Hadar, Haifa, Kiambu, Paratyphi, Risseu, Typhimurium and Virchow) | ampicillin, amoxicillin/clavulanic acid, nalidixic acid, gentamicin, TMP-SMZ, tetracycline and chloramphenicol | Bolivia, Egypt, Gambia, India, Ivory Coast, Kenya, Mali, Mexico, Morocco, Peru, Senegal and unspecified | Spain   | C |
| 2004 | Fischer [91]     | Bacterial colonization of patients undergoing international air transport: A prospective epidemiologic Study                                    | Staphylococcus aureus, Acinetobacter baumannii and Klebsiella pneumoniae                                                                | methicillin and MDR                                                                                            | Germany, Italy, Spain and Romania                                                                       | Germany | C |
| 2004 | Iverson [126]    | Fluoroquinolone resistance among Neisseria gonorrhoeae isolates in Hawaii, 1990-2000: Role of foreign importation and increasing endemic spread | Neisseria gonorrhoeae                                                                                                                   | ciprofloxacin                                                                                                  | Asia or Oceania                                                                                         | USA     | B |
| 2004 | Kassenborg [138] | Fluoroquinolone-resistant Campylobacter infections: Eating poultry outside of the home and foreign travel are risk factors                      | Campylobacter spp.                                                                                                                      | Fluoroquinolones                                                                                               | Mexico, Asia, Central America, South America and Western Europe                                         | USA     | B |

|      |                      |                                                                                                                                                                        |                                                             |                                                                                                                  |                                                                                               |               |   |
|------|----------------------|------------------------------------------------------------------------------------------------------------------------------------------------------------------------|-------------------------------------------------------------|------------------------------------------------------------------------------------------------------------------|-----------------------------------------------------------------------------------------------|---------------|---|
| 2004 | Navia [180]          | Molecular characterization of the integrons in Shigella strains isolated from patients with traveler's diarrhea                                                        | Shigella flexneri, Shigella sonnei and Shigella dysenteriae | ampicillin, tetracycline, chloramphenicol, TMP-SMZ and trimethoprim                                              | Egypt, Guatemala, Kenya, Mexico, Nicaragua, Tunisia, Turkey, Venezuela and Sub-Saharan Africa | Spain         | C |
| 2005 | Aardema [32]         | Changing epidemiology of melioidosis? A case of acute pulmonary melioidosis with fatal outcome imported from Brazil                                                    | Burkholderia pseudomallei                                   | gentamicin, cefuroxime and erythromycin                                                                          | Brazil                                                                                        | Netherlands   | A |
| 2005 | Alcoba-Florez [40] * | Outbreak of Shigella sonnei in a rural hotel in La Gomera, Canary Islands, Spain                                                                                       | Shigella sonnei                                             | amikacin, cefaclor, cefalotin, cefuroxime, cefuroxime axetil, gentamicin, nitrofurantoin, tobramycin and TMP-SMZ | Spain **                                                                                      | Not mentioned | B |
| 2005 | Denis [80]           | Polyclonal emergence and importation of community-acquired methicillin-resistant Staphylococcus aureus strains harbouring Panton-Valentine leucocidin genes in Belgium | Staphylococcus aureus                                       | methicillin, penicillin and oxacillin                                                                            | North Africa and Ecuador                                                                      | Belgium       | C |

|      |                |                                                                                                                                                           |                                       |                                                                                                                          |                                                                                                                           |                                               |   |
|------|----------------|-----------------------------------------------------------------------------------------------------------------------------------------------------------|---------------------------------------|--------------------------------------------------------------------------------------------------------------------------|---------------------------------------------------------------------------------------------------------------------------|-----------------------------------------------|---|
| 2005 | Kubota [148]   | Analysis of Salmonella enterica serotype Typhi pulsed-field gel electrophoresis patterns associated with international travel                             | Salmonella enterica serotype Typhi    | ampicillin, chloramphenicol, nalidixic acid, TMP-SMZ, sulfasoxazole, streptomycin and tetracycline                       | Bangladesh, Haiti, India, Pakistan and Vietnam                                                                            | USA                                           | C |
| 2005 | Maier [162]    | Panton-Valentine leukocidin-positive methicillin-resistant Staphylococcus aureus in Germany associated with travel or foreign family origin               | Staphylococcus aureus                 | erythromycin, fusidic acid, methicillin and oxacillin                                                                    | Germany, Saudi Arabia, Pakistan and USA                                                                                   | Egypt, Germany, Philippines, UK and West Asia | C |
| 2005 | Navia [179]    | Analysis of mechanisms of resistance to several antimicrobial agents in Shigella spp. causing travellers diarrhoea                                        | Shigella flexneri and Shigella sonnei | ampicillin, tetracycline, chloramphenicol and trimethoprim                                                               | India, Nepal, North Africa, Sub-Saharan Africa, Central America, South America, Southeast Asia, West Asia and unspecified | Spain                                         | C |
| 2005 | Olsen [188]    | VTEC O117:K1:H7 A new clinal group of E. coli associated with persistent diarrhoea in Danish travellers                                                   | Escherichia coli                      | streptomycin, sulfonamides and trimethoprim                                                                              | Bangladesh, Cuba, Egypt, Eritrea, Ghana, India, Iraq, Iran, Israel, Malaysia, Pakistan, Tanzania and Thailand             | Denmark                                       | C |
| 2005 | Shrestha [224] | Community-acquired methicillin-resistant Staphylococcus aureus in a returned traveler                                                                     | Staphylococcus aureus                 | methicillin                                                                                                              | Democratic Republic of the Congo                                                                                          | USA                                           | A |
| 2006 | Weyrich [255]  | Fatal multidrug-resistant Acinetobacter baumannii sepsis in a patient with travel history and recent onset of systemic lupus erythematosus: A case report | Acinetobacter baumannii               | penicillins, cephalosporins, aminoglycosides, fluoroquinolones, rifampicin, tetracyclines, oxazolidinones and macrolides | Greece                                                                                                                    | Germany                                       | B |



|      |                |                                                                                                                                                        |                                                 |                                                                                                                       |                                                      |             |   |
|------|----------------|--------------------------------------------------------------------------------------------------------------------------------------------------------|-------------------------------------------------|-----------------------------------------------------------------------------------------------------------------------|------------------------------------------------------|-------------|---|
| 2007 | Ruiz [211]     | Trends in antimicrobial resistance in <i>Campylobacter</i> spp. causing traveler's diarrhea                                                            | <i>Campylobacter</i> spp.                       | amoxicillin/clavulanic acid, ampicillin, tetracycline, nalidixic acid, ciprofloxacin, chloramphenicol and clindamycin | Indonesia, Nicaragua, Peru, Africa, America and Asia | Spain       | C |
| 2007 | Wybo [259]     | Outbreak of multidrug-resistant <i>Acinetobacter baumannii</i> in a Belgian university hospital after transfer of patients from Greece                 | <i>Acinetobacter baumannii</i>                  | carbapenems, beta-lactams, fluoroquinolones and amikacin                                                              | Greece                                               | Belgium     | A |
| 2008 | Al Naiemi [39] | Extended-spectrum-beta-lactamase production in a <i>Salmonella enterica</i> serotype Typhi strain from the Philippines                                 | <i>Salmonella enterica</i> serotype Typhi       | ampicillin, ceftazidime, cefotaxime, cefpodoxime, ciprofloxacin, gentamicin, tobramycin, piperacillin and TMP-SMZ     | Philippines                                          | Netherlands | C |
| 2008 | Arai [47]      | Epidemiological evidence of multidrug-resistant <i>Shigella sonnei</i> colonization in India by sentinel surveillance in a Japanese quarantine station | <i>Shigella sonnei</i>                          | tetracycline, TMP-SMZ and nalidixic acid                                                                              | India                                                | Japan       | C |
| 2008 | Bochet [56]    | Community-acquired methicillin-resistant <i>Staphylococcus aureus</i> infections in two scuba divers returning from the Philippines                    | <i>Staphylococcus aureus</i>                    | methicillin and beta-lactams                                                                                          | Philippines                                          | Switzerland | B |
| 2008 | Gupta [101]    | Laboratory-based surveillance of Paratyphoid Fever in the United States: Travel and antimicrobial resistance                                           | <i>Salmonella enterica</i> serotype Paratyphi A | nalidixic acid, ciprofloxacin and multidrug resistant                                                                 | Bangladesh, India, Indonesia and Pakistan            | USA         | C |

|      |                |                                                                                                                                                                   |                                    |                                                                                                                                                                                                             |                                                                     |         |   |
|------|----------------|-------------------------------------------------------------------------------------------------------------------------------------------------------------------|------------------------------------|-------------------------------------------------------------------------------------------------------------------------------------------------------------------------------------------------------------|---------------------------------------------------------------------|---------|---|
| 2008 | Haukka [111]   | Emerging resistance to newer antimicrobial agents among Shigella Isolated from Finnish foreign travellers                                                         | Shigella spp.                      | ampicillin, chloramphenicol, streptomycin, sulfonamide, gentamicin, cefoxime, tetracycline, trimethoprim, ciprofloxacin, Nalidixic acid, mecillinam, imipenem, neomycin, cefotaxime and multidrug resistant | China, Egypt, Asia, Africa, Americas and Europe                     | Finland | B |
| 2008 | Larsen [152]   | Epidemiology of European community-associated methicillin-resistant Staphylococcus aureus clonal complex 80 type IV strains isolated in Denmark from 1993 to 2004 | Staphylococcus aureus              | streptomycin, tetracycline, kanamycin, erythromycin, clindamycin and fusidic acid                                                                                                                           | Unspecified                                                         | Denmark | C |
| 2008 | Laupland [153] | Community-onset extended-spectrum beta-lactamase (ESBL) producing Escherichia coli: Importance of international travel                                            | Escherichia coli                   | ciprofloxacin, gentamicin, nitrofurantoin and TMP-SMZ                                                                                                                                                       | India, Mexico, North Africa, Sub-Saharan Africa, West Asia and Asia | Canada  | C |
| 2008 | Mensa [169]    | Quinolone resistance among Shigella spp. isolated from travellers returning from India                                                                            | Shigella spp.                      | ciprofloxacin, quinolone and nalidixic acid                                                                                                                                                                 | India, Equatorial Guinea and Mali                                   | Spain   | C |
| 2008 | Pontali [201]  | Imported typhoid fever with hepatitis from Bangladesh: A case of delayed response to ceftriaxone?                                                                 | Salmonella enterica serotype Typhi | ampicillin, cefazolin, cefoxitin, chloramphenicol, ciprofloxacin, gentamicin, levofloxacin and TMP-SMZ                                                                                                      | Bangladesh                                                          | Italy   | B |

|      |                  |                                                                                                                                                                                                                                                    |                                                                                                 |                                                                                                                                                                                          |                                                                                                                                                         |         |   |
|------|------------------|----------------------------------------------------------------------------------------------------------------------------------------------------------------------------------------------------------------------------------------------------|-------------------------------------------------------------------------------------------------|------------------------------------------------------------------------------------------------------------------------------------------------------------------------------------------|---------------------------------------------------------------------------------------------------------------------------------------------------------|---------|---|
| 2008 | Schleucher [218] | Panton-Valentine leukocidin-producing methicillin-sensitive <i>Staphylococcus aureus</i> as a cause for recurrent, contagious skin infections in young, healthy travelers returned from a tropical country: A new worldwide public health problem? | <i>Staphylococcus aureus</i>                                                                    | Penicillin G                                                                                                                                                                             | Fiji                                                                                                                                                    | Germany | B |
| 2008 | Szabo [231]      | Imported PER-1 producing <i>Pseudomonas aeruginosa</i> , PER-1 producing <i>Acinetobacter baumannii</i> and VIM-2-producing <i>Pseudomonas aeruginosa</i> strains in Hungary                                                                       | <i>Pseudomonas aeruginosa</i> , <i>Acinetobacter baumannii</i> and <i>Klebsiella pneumoniae</i> | amikacin, aztreonam, cefepime, cefotaxime, ceftazidime, ceftriaxone, ciprofloxacin, gentamicin, imipenem, imipenem + EDTA, meropenem, netilmicin, piperacillin/tazobactam and tobramycin | Egypt                                                                                                                                                   | Hungary | A |
| 2008 | Vlieghe [250]    | Trends of norfloxacin and erythromycin resistance of <i>Campylobacter jejuni</i> / <i>Campylobacter coli</i> isolates recovered from international travelers, 1994 to 2006                                                                         | <i>Campylobacter jejuni</i> and/or <i>Campylobacter coli</i>                                    | erythromycin and norfloxacin                                                                                                                                                             | Egypt, Haiti, India, Iran, Lebanon, Spain, Thailand, North Africa, Sub-Saharan Africa, Central America, South America, West Asia, East Asia, South Asia | Belgium | B |
| 2009 | Cabrera [64]     | Characterization of the enzyme aac(3)-id in a clinical isolate of <i>Salmonella enterica</i> serovar Haifa causing traveler's diarrhea                                                                                                             | <i>Salmonella enterica</i> serotype Haifa                                                       | gentamicin, nalidixic acid and tetracycline                                                                                                                                              | Egypt                                                                                                                                                   | Spain   | C |

|      |                        |                                                                                                                                                              |                                                                                             |                                                                                                                                                   |                                                                                                               |           |   |
|------|------------------------|--------------------------------------------------------------------------------------------------------------------------------------------------------------|---------------------------------------------------------------------------------------------|---------------------------------------------------------------------------------------------------------------------------------------------------|---------------------------------------------------------------------------------------------------------------|-----------|---|
| 2009 | Evans [88]             | Risk factors for ciprofloxacin-resistant <i>Campylobacter</i> infection in Wales                                                                             | <i>Campylobacter</i> spp.                                                                   | ciprofloxacin                                                                                                                                     | Spain and unspecified                                                                                         | UK        | B |
| 2009 | Hume [120]             | Increasing rates and clinical consequences of nalidixic acid-resistant isolates causing enteric fever in returned travellers: an 18-year experience          | <i>Salmonella enterica</i> serotype Typhi and <i>Salmonella enterica</i> serotype Paratyphi | nalidixic acid                                                                                                                                    | Bangladesh, Cambodia, China, India, Malaysia, Pakistan, and Sri Lanka                                         | Australia | C |
| 2009 | Izumiya [127]          | Characterization of <i>Shigella sonnei</i> isolates from travel-associated cases in Japan                                                                    | <i>Shigella sonnei</i>                                                                      | nalidixic acid                                                                                                                                    | China, India, Korea, Nepal, Thailand, Peru and Vietnam                                                        | Japan     | C |
| 2009 | Lindgren [158]         | Reduced fluoroquinolone susceptibility in <i>Salmonella enterica</i> isolates from Travelers, Finland                                                        | <i>Salmonella enterica</i> spp.                                                             | ciprofloxacin and nalidixic acid                                                                                                                  | Egypt, India, Malaysia, Morocco, Portugal, Spain, Tanzania, Thailand and Vietnam                              | Finland   | C |
| 2009 | Mendez Arancibia [168] | Evolution of antimicrobial resistance in enteroaggregative <i>Escherichia coli</i> and enterotoxigenic <i>Escherichia coli</i> causing traveller's diarrhoea | <i>Escherichia coli</i>                                                                     | ampicillin, amoxicillin/clavulanic acid, chloramphenicol, tetracycline, nalidixic acid, ciprofloxacin and TMP-SMZ                                 | Unspecified                                                                                                   | Spain     | C |
| 2009 | Pitout [198]           | Molecular characteristics of travel-related extended-spectrum- $\beta$ -lactamase-producing <i>Escherichia coli</i> isolates from the Calgary Health Region  | <i>Escherichia coli</i>                                                                     | beta-lactams, TMP-SMZ, piperacillin/tazobactam, amoxicillin/clavulanic acid, tobramycin, gentamicin, amikacin, nitrofurantoin, and ciprofloxacin. | USA, Sub-Saharan Africa, North Africa, South America, Central America, West Asia, South Asia, Asia and Europe | Canada    | C |
| 2009 | Taguchi [232]          | Plasmid-mediated quinolone resistance in <i>Salmonella</i> isolated from patients with overseas Travelers' Diarrhea in Japan                                 | <i>Salmonella enterica</i> spp.                                                             | ampicillin, streptomycin, tetracycline, chloramphenicol, TMP-SMZ and nalidixic acid                                                               | Indonesia, Malaysia, Singapore, Thailand and Vietnam                                                          | Japan     | C |

|      |                |                                                                                                                                                                                                                |                                                                             |                                                                                                                                                                                    |                                                                                                                                                                                 |           |   |
|------|----------------|----------------------------------------------------------------------------------------------------------------------------------------------------------------------------------------------------------------|-----------------------------------------------------------------------------|------------------------------------------------------------------------------------------------------------------------------------------------------------------------------------|---------------------------------------------------------------------------------------------------------------------------------------------------------------------------------|-----------|---|
| 2009 | Yong [261]     | Characterization of a new metallo- $\beta$ -lactamase gene, blaNDM-1, and a novel erythromycin esterase gene carried on a unique genetic structure in <i>Klebsiella pneumoniae</i> sequence type 14 from India | <i>Klebsiella pneumoniae</i>                                                | ampicillin, piperacillin, cephalothin, cefoxitin, cefotaxime, cefuroxime, ceftazidime, aztreonam, cefepime, ertapenem, imipenem, meropenem and ciprofloxacin                       | India                                                                                                                                                                           | Sweden    | C |
| 2010 | Drews [82]     | Laboratory based surveillance of travel-related <i>Shigella sonnei</i> and <i>Shigella flexneri</i> in Alberta from 2002 to 2007                                                                               | <i>Shigella flexneri</i> and <i>Shigella sonnei</i>                         | ampicillin, amoxicillin/clavulanic acid, ceftiofur, ceftriaxone, TMP-SMZ, sulfisoxazole, chloramphenicol, ciprofloxacin, nalidixic acid, gentamicin, streptomycin and tetracycline | North Africa, Sub-Saharan Africa, North America, Central America, South America, West Asia, South Asia and East Asia                                                            | Canada    | C |
| 2010 | Ellington [83] | First international spread and dissemination of the virulent Queensland community-associated methicillin-resistant <i>Staphylococcus aureus</i> strain                                                         | <i>Staphylococcus aureus</i>                                                | methicillin, oxacillin, erythromycin and rifampicin                                                                                                                                | Australia                                                                                                                                                                       | UK        | C |
| 2010 | Kennedy [24] + | Colonisation with <i>Escherichia coli</i> resistant to "critically important" antibiotics: a high risk for international travellers                                                                            | <i>Escherichia coli</i> , <i>Klebsiella</i> spp. and <i>Morganella</i> spp. | gentamicin, ciprofloxacin, beta-lactams and cephalosporins (3rd Generation)                                                                                                        | China, Hong Kong, India, Korea, Mexico, Nepal, Sri Lanka, Taiwan, North Africa, Sub-Saharan Africa, North America, South America, Southeast Asia, West Asia, Europe and Oceania | Australia | B |

|      |                   |                                                                                                                                                           |                                                                               |                                                                                         |                                                                                                                                                                                                 |             |   |
|------|-------------------|-----------------------------------------------------------------------------------------------------------------------------------------------------------|-------------------------------------------------------------------------------|-----------------------------------------------------------------------------------------|-------------------------------------------------------------------------------------------------------------------------------------------------------------------------------------------------|-------------|---|
| 2010 | Kishore [141]     | Fever and abdominal pain in a returning traveller                                                                                                         | Salmonella enterica serotype Typhi                                            | amoxicillin and chloramphenicol                                                         | Pakistan                                                                                                                                                                                        | UK          | C |
| 2010 | Patel [195]       | Imported enteric fever: Case series from the hospital for tropical diseases, London, United Kingdom                                                       | Salmonella enterica serotype Typhi and Salmonella enterica serotype Paratyphi | ciprofloxacin, ampicillin, chloramphenicol, fluoroquinolone, nalidixic acid and TMP-SMZ | Nigeria and South Asia                                                                                                                                                                          | UK          | C |
| 2010 | Porter [202]      | The epidemiology of travelers' diarrhea in Incirlik, Turkey: A region with a predominance of heat-stable toxin producing enterotoxigenic Escherichia coli | Escherichia coli and Campylobacter spp.                                       | ciprofloxacin, TMP-SMZ, tetracycline and nalidixic acid                                 | Turkey                                                                                                                                                                                          | USA         | C |
| 2010 | Sharafeldin [221] | Health risks encountered by Dutch medical students during an elective in the tropics and the quality and comprehensiveness of pre-and post-travel care    | Staphylococcus aureus                                                         | methicillin                                                                             | Unspecified                                                                                                                                                                                     | Netherlands | C |
|      |                   |                                                                                                                                                           |                                                                               |                                                                                         |                                                                                                                                                                                                 |             | A |
| 2010 | Stenheim [229]    | Imported methicillin-resistant Staphylococcus aureus, Sweden                                                                                              | Staphylococcus aureus                                                         | methicillin                                                                             | Cyprus, Greece, Ireland, Lebanon, Spain, Syria, Thailand, Turkey, UK, USA, Yugoslavia, North Africa, Sub-Saharan Africa, North America, South America, East Asia, West Asia, Europe and Oceania | Sweden      | C |

|      |                    |                                                                                                                                                                                             |                                                                                           |                                                                                                                       |                                                                           |           |   |
|------|--------------------|---------------------------------------------------------------------------------------------------------------------------------------------------------------------------------------------|-------------------------------------------------------------------------------------------|-----------------------------------------------------------------------------------------------------------------------|---------------------------------------------------------------------------|-----------|---|
| 2010 | Tangden [234]      | Foreign travel is a major risk factor for colonization with <i>Escherichia coli</i> producing CTX-M-type extended-spectrum $\beta$ -lactamases: a prospective study with Swedish volunteers | <i>Escherichia coli</i>                                                                   | beta-lactams                                                                                                          | India, Sub-Saharan Africa, North Africa, West Asia, Asia and Europe       | Sweden    | C |
| 2010 | Tappe [235]        | Panton-Valentine leukocidin-positive <i>Staphylococcus aureus</i> infections in returning travelers                                                                                         | <i>Staphylococcus aureus</i>                                                              | methicillin                                                                                                           | Costa Rica, Pakistan and Thailand                                         | Germany   | B |
| 2011 | Al-Mashhadani [45] | Foreign travel and decreased ciprofloxacin susceptibility in <i>Salmonella enterica</i> infections                                                                                          | <i>Salmonella enterica</i> serotypes Enteritidis, Typhimurium, Newport, Virchow and other | nalidixic acid                                                                                                        | Unspecified                                                               | UK        | B |
| 2011 | Bottieau [58]      | Epidemiology and outcome of <i>Shigella</i> , <i>Salmonella</i> and <i>Campylobacter</i> infections in travellers returning from the tropics with fever and diarrhoea                       | <i>Shigella</i> spp., <i>Salmonella</i> spp. and <i>Campylobacter jejuni</i>              | ampicillin, norfloxacin and TMP-SMZ                                                                                   | Sub-Saharan Africa, North Africa, South America, South Asia and West Asia | Belgium   | B |
| 2011 | Chan [67]          | The perils of medical tourism: NDM-1-positive <i>Escherichia coli</i> causing febrile neutropenia in a medical tourist                                                                      | <i>Escherichia coli</i>                                                                   | amikacin, ampicillin, ceftriaxone, ceftazidime, ciprofloxacin, ertapenem, gentamicin, imipenem, meropenem and TMP-SMZ | Bangladesh                                                                | Singapore | C |

|      |                  |                                                                                                                                                                              |                                                                        |                                                                                                                                                                                                                                               |                                                                                         |             |   |
|------|------------------|------------------------------------------------------------------------------------------------------------------------------------------------------------------------------|------------------------------------------------------------------------|-----------------------------------------------------------------------------------------------------------------------------------------------------------------------------------------------------------------------------------------------|-----------------------------------------------------------------------------------------|-------------|---|
| 2011 | Christenson [70] | Methicillin-resistant Staphylococcus aureus infection in Uppsala County, Sweden                                                                                              | Staphylococcus aureus                                                  | clindamycin, fusidic acid, isoxapenicillin and tetramycin                                                                                                                                                                                     | Brazil, Egypt, Greece, India, Italy, Japan, Norway, UK, USA, North Africa and West Asia | Sweden      | C |
| 2011 | Dhanji [26]      | Variation in the genetic environments of blaCTX-M-15 in Escherichia coli from the faeces of travellers returning to the United Kingdom                                       | Escherichia coli                                                       | cefotaxime, ceftazidime, piperacillin, piperacillin/tazobactam, ciprofloxacin, amikacin, gentamicin, tobramycin and beta-lactams                                                                                                              | Afghanistan, Egypt, India, Kenya, Kuwait, Pakistan, Thailand                            | UK          | B |
| 2011 | Gilmour [98]     | Vibrio cholerae in traveler from Haiti to Canada                                                                                                                             | Vibrio cholerae                                                        | TMP-SMZ                                                                                                                                                                                                                                       | Haiti                                                                                   | Canada      | C |
| 2011 | Guiral [99]      | CTX-M-15-producing enteroaggregative Escherichia coli as cause of travelers' diarrhea                                                                                        | Escherichia coli                                                       | ampicillin, piperacillin, amoxicillin/clavulanic acid, ampicillin/sulbactam, cefuroxime, Cefazoline, cefepime, cefotaxime, ceftazidime, gentamicin, tobramycin, aztreonam, ciprofloxacin, norfloxacin, levofloxacin, tetracycline and TMP-SMZ | India                                                                                   | Spain       | C |
| 2011 | Hassing [110]    | Analysis of mechanisms involved in reduced susceptibility to ciprofloxacin in Salmonella enterica serotypes Typhi and Paratyphi A isolates from travellers to Southeast Asia | Salmonella enterica serotype Typhi and Salmonella enterica Paratyphi A | ciprofloxacin and nalidixic acid                                                                                                                                                                                                              | India and Pakistan                                                                      | Netherlands | A |



|      |                |                                                                                                                                                                                             |                                              |                                                                                                                                                                                                                                                                                                                         |                                                                                                                                                                                                  |                        |   |
|------|----------------|---------------------------------------------------------------------------------------------------------------------------------------------------------------------------------------------|----------------------------------------------|-------------------------------------------------------------------------------------------------------------------------------------------------------------------------------------------------------------------------------------------------------------------------------------------------------------------------|--------------------------------------------------------------------------------------------------------------------------------------------------------------------------------------------------|------------------------|---|
| 2011 | Hussenet [121] | Multidrug-resistant <i>Acinetobacter baumannii</i> infections in three returning travelers evacuated from Algeria, Thailand, and Turkey after hospitalization in local intensive care units | <i>Acinetobacter baumannii</i>               | sulbactam, ticarcillin, ticarcillin/clavulanic acid, piperacillin, piperacillin/tazobactam, imipenem, meropenem, doripenem, ceftazidime, cefepime, cefpirome, tobramycin, isepamicin, gentamicin, netilmicin, chloramphenicol, tetracycline, pefloxacin, ofloxacin, ciprofloxacin, levofloxacin, rifampicin and TMP-SMZ | Algeria, Thailand and Turkey                                                                                                                                                                     | France                 | A |
| 2011 | Le Hello [155] | International spread of an epidemic population of <i>Salmonella enterica</i> serotype Kentucky ST198 resistant to ciprofloxacin                                                             | <i>Salmonella enterica</i> serotype Kentucky | ciprofloxacin                                                                                                                                                                                                                                                                                                           | Algeria, Cameroon, Djibouti, Egypt, Iran, Iraq, Jordan, Kenya, Lebanon, Libya, Mauritania, Morocco, Nigeria, Saudi Arabia, South Africa, Spain, Sudan, Syria, Tanzania, Togo, Tunisia and Turkey | France, UK and Denmark | C |
| 2011 | Medalla [166]  | Ciprofloxacin-resistant <i>Salmonella enterica</i> Serotype Typhi, United States, 1999-2008                                                                                                 | <i>Salmonella enterica</i> serotype Typhi    | ampicillin, ciprofloxacin, chloramphenicol, TMP-SMZ, sulfamexazole, nalidixic acid, streptomycin and tetracycline                                                                                                                                                                                                       | India and unspecified                                                                                                                                                                            | USA                    | C |
| 2011 | Mina [172]     | Canada's first case of a multi-resistant <i>Corynebacterium diphtheriae</i> strain, isolated from skin abscess                                                                              | <i>Corynebacterium diphtheriae</i>           | clindamycin, erythromycin, tetracycline, TMP-SMZ, ceftriaxone, cefotaxime, telithromycin and chloramphenicol                                                                                                                                                                                                            | India                                                                                                                                                                                            | Canada                 | B |

|      |                      |                                                                                                                                                             |                                                                                                                                              |                                                                                                                                                                                         |                             |                                                         |   |
|------|----------------------|-------------------------------------------------------------------------------------------------------------------------------------------------------------|----------------------------------------------------------------------------------------------------------------------------------------------|-----------------------------------------------------------------------------------------------------------------------------------------------------------------------------------------|-----------------------------|---------------------------------------------------------|---|
| 2011 | O'Sullivan [190]     | Burkholderia pseudomallei infection in a child with cystic fibrosis: Acquisition in the western hemisphere                                                  | Burkholderia pseudomallei                                                                                                                    | TMP-SMZ                                                                                                                                                                                 | Aruba                       | USA                                                     | C |
| 2011 | Ouyang-Latimer [191] | In vitro antimicrobial susceptibility of bacterial enteropathogens isolated from international travelers to Mexico, Guatemala, and India from 2006 to 2008. | Campylobacter spp. and Escherichia coli                                                                                                      | ampicillin, nalidixic acid, tetracycline, doxycycline, TMP-SMZ, ceftriaxone, rifaximin, ciprofloxacin, levofloxacin and azithromycin                                                    | Guatemala, India and Mexico | USA                                                     | A |
| 2011 | Pandey [193] *       | Travelers' diarrhea in Nepal: an update on the pathogens and antibiotic resistance                                                                          | Shigella spp., Plesiomonas spp., Campylobacter spp., Aeromonas spp., Escherichia coli and Salmonella enterica spp. (Non-Typhoidal Serotypes) | amoxicillin, TMP-SMZ, nalidixic acid, ciprofloxacin and azithromycin                                                                                                                    | Nepal                       | North America, Australia, Europe, Japan and New Zealand | A |
| 2011 | Peirano [196]        | New Delhi metallo- $\beta$ -lactamase from traveler returning to Canada                                                                                     | Escherichia coli                                                                                                                             | amoxicillin/clavulanic acid, piperacillin/tazobactam, cefoxitin, ceftriaxone, ceftazidime, aztreonam, meropenem, ertapenem, amikacin, gentamicin, tobramycin, ciprofloxacin and TMP-SMZ | India                       | Canada                                                  | B |
| 2011 | Tappe [236]          | Travel-related streptococcal toxic shock syndrome caused by emm type 78 Streptococcus pyogenes                                                              | Streptococcus pyogenes                                                                                                                       | tetracycline                                                                                                                                                                            | Malaysia and Singapore      | Germany                                                 | C |

|      |                  |                                                                                                                                                                        |                                      |                                                                                                                                                                                                                                                                                         |                                                                 |                    |   |
|------|------------------|------------------------------------------------------------------------------------------------------------------------------------------------------------------------|--------------------------------------|-----------------------------------------------------------------------------------------------------------------------------------------------------------------------------------------------------------------------------------------------------------------------------------------|-----------------------------------------------------------------|--------------------|---|
| 2012 | Alexander [41]   | Escherichia coli O104:H4 infections and international travel                                                                                                           | Escherichia coli                     | amikacin, tetracycline, TMP-SMZ and extended-spectrum beta-lactams                                                                                                                                                                                                                      | Germany                                                         | Canada             | A |
| 2012 | Ali [42]         | Outbreak of a South West Pacific clone Panton-Valentine leucocidin-positive methicillin-resistant Staphylococcus aureus infection in a UK neonatal intensive care unit | Staphylococcus aureus                | methicillin and erythromycin                                                                                                                                                                                                                                                            | Philippines                                                     | UK                 | B |
| 2012 | Fleateau [94]    | Recurrent pyelonephritis due to NDM-1 metallo-beta-lactamase producing Pseudomonas aeruginosa in a patient returning from Serbia, France, 2012                         | Pseudomonas aeruginosa               | ticarcillin, ticarcillin/clavulanic acid, ceftazidime, cefepime, aztreonam, imipenem, meropenem, doripenem, tobramycin, gentamicin, amikacin, ciprofloxacin, doxycycline and tigecycline                                                                                                | Serbia                                                          | France             | B |
| 2012 | Fleming [95]     | Lactococcus garvieae multi-valve infective endocarditis in a traveler returning from South Korea                                                                       | Lactococcus garvieae                 | ampicillin, gentamicin and clindamycin                                                                                                                                                                                                                                                  | South Korea                                                     | USA                | B |
| 2012 | Hendriksen [113] | Characterization of isolates of Salmonella enterica serovar Stanley, a serovar endemic to Asia and associated with travel                                              | Salmonella enterica serotype Stanley | amoxicillin, ampicillin, cefazolin, ceftiofur, cefepime, ceftazidime, ceftiofur, ceftriaxone, cephalothin, chloramphenicol, ciprofloxacin, florfenicol, fosfomycin/trometamol, gentamicin, nalidixic acid, spectinomycin, streptomycin, sulfamethoxazole, tetracycline and trimethoprim | Afghanistan, Pakistan, Philippines, Thailand and Southeast Asia | Denmark and France | B |

|      |                |                                                                                                                                                            |                                                                                                                                                                                                                                        |                                                                                                                                                                              |                                              |                |   |
|------|----------------|------------------------------------------------------------------------------------------------------------------------------------------------------------|----------------------------------------------------------------------------------------------------------------------------------------------------------------------------------------------------------------------------------------|------------------------------------------------------------------------------------------------------------------------------------------------------------------------------|----------------------------------------------|----------------|---|
| 2012 | Hrabak [116]   | NDM-1 producing <i>Acinetobacter baumannii</i> isolated from a patient repatriated to the Czech Republic from Egypt, July 2011                             | <i>Acinetobacter baumannii</i>                                                                                                                                                                                                         | ampicillin/sulbactam, amikacin, cefepime, ceftazidime, ciprofloxacin, gentamycin, meropenem, nalidixic acid, piperacillin, piperacillin/tazobactam, tetracycline and TMP-SMZ | Egypt                                        | Czech Republic | B |
| 2012 | Jeon [129]     | Quinolone-resistant <i>Shigella flexneri</i> isolated in a patient who travelled to India                                                                  | <i>Shigella flexneri</i>                                                                                                                                                                                                               | ampicillin/sulbactam, ampicillin, ciprofloxacin, norfloxacin, ofloxacin, levofloxacin and TMP-SMZ                                                                            | India                                        | South Korea    | C |
| 2012 | Meyer [171]    | Pet animals and foreign travel are risk factors for colonisation with extended-spectrum $\beta$ -lactamase-producing <i>Escherichia coli</i>               | <i>Escherichia coli</i>                                                                                                                                                                                                                | beta-lactams                                                                                                                                                                 | Greece and Africa                            | Germany        | B |
| 2012 | Nemeth [181]   | Multidrug-resistant bacteria in travellers hospitalized abroad: prevalence, characteristics, and influence on clinical outcome                             | <i>Escherichia coli</i> , <i>Klebsiella pneumoniae</i> , <i>Acinetobacter baumannii</i> , <i>Enterobacter cloacae</i> , <i>Pseudomonas aeruginosa</i> , <i>Proteus</i> spp., <i>Staphylococcus aureus</i> and other Enterobacteriaceae | amoxicillin/clavulanate, piperacillin/tazobactam, methicillin, carbapenems, cephalosporins, fluoroquinolones and aminoglycosides                                             | Africa, Americas, Asia, Australia and Europe | Switzerland    | B |
| 2012 | Niederer [182] | Genotypes and antibiotic resistances of <i>Campylobacter jejuni</i> and <i>Campylobacter coli</i> isolates from domestic and travel-associated human cases | <i>Campylobacter jejuni</i> and <i>Campylobacter coli</i>                                                                                                                                                                              | quinolones                                                                                                                                                                   | Europe and unspecified                       | Switzerland    | C |

|      |                  |                                                                                                                                                                         |                                                 |                                                                                                                   |                                                                                                                                                             |        |   |
|------|------------------|-------------------------------------------------------------------------------------------------------------------------------------------------------------------------|-------------------------------------------------|-------------------------------------------------------------------------------------------------------------------|-------------------------------------------------------------------------------------------------------------------------------------------------------------|--------|---|
| 2012 | Rodriguez [209]  | Potential international spread of multidrug-resistant invasive <i>Salmonella enterica</i> serovar Enteritidis                                                           | <i>Salmonella enterica</i> serotype Enteritidis | ampicillin, chloramphenicol, streptomycin, sulfonamides, tetracycline and trimethoprim                            | Nigeria and Uganda                                                                                                                                          | UK     | A |
| 2012 | Shiferaw [222]   | Antimicrobial susceptibility patterns of <i>Shigella</i> isolates in foodborne diseases active Surveillance Network (FoodNet) Sites, 2000–2010                          | <i>Shigella</i> spp.                            | ampicillin, tetracycline, TMP-SMZ and chloramphenicol                                                             | Unspecified                                                                                                                                                 | USA    | C |
| 2012 | Silva [226]      | Outbreak of haemolytic uraemic syndrome due to <i>Shiga</i> toxin-producing <i>Escherichia coli</i> O104:H4 among French tourists returning from Turkey, September 2011 | <i>Escherichia coli</i>                         | ampicillin, nalidixic acid, streptomycin, sulphonamide, trimethoprim, TMP-SMZ and tetracycline                    | Turkey                                                                                                                                                      | France | C |
| 2012 | Tatavarthy [237] | Molecular typing and resistance analysis of travel-associated <i>Salmonella enterica</i> serotype Typhi                                                                 | <i>Salmonella enterica</i> serotype Typhi       | amoxicillin/clavulanic acid, ampicillin, chloramphenicol, streptomycin, ciprofloxacin, nalidixic acid and TMP-SMZ | Bangladesh, Haiti, India, Pakistan, Peru and UAE                                                                                                            | USA    | C |
| 2012 | Tham [240]       | Duration of colonization with extended-spectrum beta-lactamase-producing <i>Escherichia coli</i> in patients with travellers' diarrhoea                                 | <i>Escherichia coli</i>                         | beta-Lactams                                                                                                      | Afghanistan, Bangladesh, Bolivia, Cambodia, China, Cyprus, Egypt, Ghana, India, Iraq, Kurdistan, Pakistan, Spain, Syria, Lebanon, Thailand, Tunisia and UAE | Sweden | B |

|      |                    |                                                                                                                                      |                                                                     |                                                                                                                                                                                                                           |         |             |   |
|------|--------------------|--------------------------------------------------------------------------------------------------------------------------------------|---------------------------------------------------------------------|---------------------------------------------------------------------------------------------------------------------------------------------------------------------------------------------------------------------------|---------|-------------|---|
| 2013 | Ahmed-Bentley [38] | Gram-negative bacteria that produce carbapenemases causing death attributed to recent foreign hospitalization                        | Klebsiella pneumoniae, Escherichia coli and Acinetobacter baumannii | amikacin, aztreonam, ceftazidime, ceftriaxone, ciprofloxacin, ertapenem, gentamycin, imipenem, meropenem, piperacillin/tazobactam, tigecycline, TMP-SMZ and tobramycin                                                    | India   | Canada      | C |
| 2013 | Bathoorn [51]      | Latent introduction to the Netherlands of multiple antibiotic resistance including NDM-1 after hospitalisation in Egypt, August 2013 | Klebsiella pneumoniae                                               | meropenem                                                                                                                                                                                                                 | Egypt   | Netherlands | C |
| 2013 | Chan [68]          | The characteristics of Klebsiella pneumoniae that produce KPC-2 imported from Greece                                                 | Klebsiella pneumoniae                                               | amoxicillin/clavulanate, amikacin, aztreonam, ceftazidime, cefuroxime, ciprofloxacin imipenem, meropenem, piperacillin/tazobactam, and tobramycin                                                                         | Greece  | Canada      | C |
| 2013 | Decousser [79]     | Outbreak of NDM-1-producing Acinetobacter baumannii in France, January to May 2013                                                   | Acinetobacter baumannii                                             | ampicillin/sulbactam, ticarcillin/clavulanic acid, piperacillin, piperacillin/tazobactam, aztreonam, ceftazidime, cefepime, meropenem, imipenem, doripenem, ciprofloxacin, gentamycin, tobramycin, TMP-SMZ and fosfomycin | Algeria | France      | C |

|      |                 |                                                                                                                                                                                              |                                                                                                                                                                                           |                                                                                                            |                                                                         |             |   |
|------|-----------------|----------------------------------------------------------------------------------------------------------------------------------------------------------------------------------------------|-------------------------------------------------------------------------------------------------------------------------------------------------------------------------------------------|------------------------------------------------------------------------------------------------------------|-------------------------------------------------------------------------|-------------|---|
| 2013 | Hassing [109]   | Decreased ciprofloxacin susceptibility in Salmonella Typhi and Paratyphi infections in ill-returned travellers: The impact on clinical outcome and future treatment options.                 | Salmonella enterica serotype Typhi and Salmonella enterica serotype Paratyphi A                                                                                                           | ciprofloxacin                                                                                              | South Asia                                                              | Netherlands | B |
| 2013 | Josseaume [133] | Multidrug-resistant bacteria among patients treated in foreign hospitals: Management considerations during medical repatriation                                                              | Escherichia coli, Pseudomonas aeruginosa, Proteus mirabilis, Klebsiella pneumoniae, Enterococcus spp., Staphylococcus aureus, Acinetobacter baumannii, Enterobacteriaceae and unspecified | ceftazidime, methicillin, vancomycin, beta-lactams, cephalosporins, quinolones and multidrug-resistant     | Algeria, Congo, Morocco, Portugal, Spain, Thailand, Tunisia and Uruguay | France      | C |
| 2013 | Ko [145]        | First imported case of skin infection caused by PVL-positive ST30 community-associated methicillin-resistant Staphylococcus aureus clone in a returning Korean traveler from the Philippines | Staphylococcus aureus                                                                                                                                                                     | methicillin                                                                                                | Philippines                                                             | South Korea | A |
| 2013 | Landelle [149]  | Protracted outbreak of multidrug-resistant Acinetobacter baumannii after intercontinental transfer of colonized patients                                                                     | Acinetobacter baumannii                                                                                                                                                                   | ampicillin/sulbactam, ciprofloxacin, imipenem, rifampicin, aminoglycosides, cephalosporins and penicillins | Tahiti                                                                  | France      | B |

|      |                       |                                                                                                                                                                            |                                                                                     |                                                                                                                                                                                                                                        |                                                                                       |             |   |
|------|-----------------------|----------------------------------------------------------------------------------------------------------------------------------------------------------------------------|-------------------------------------------------------------------------------------|----------------------------------------------------------------------------------------------------------------------------------------------------------------------------------------------------------------------------------------|---------------------------------------------------------------------------------------|-------------|---|
| 2013 | Lausch [154]          | Colonisation with multi-resistant Enterobacteriaceae in hospitalised Danish patients with a history of recent travel: A cross-sectional study                              | Escherichia coli                                                                    | beta-lactams                                                                                                                                                                                                                           | North Africa, Sub-Saharan Africa, South Asia, West Asia, Asia and Europe              | Denmark     | C |
| 2013 | Lee [156]             | CTX-M-55-type extended-spectrum $\beta$ -lactamase-producing Shigella sonnei isolated from a Korean patient who had travelled to China                                     | Shigella sonnei                                                                     | ampicillin, ampicillin/sulbactam, aztreonam, cefotaxime, ceftazidime, cephalothin, piperacillin and TMP-SMZ                                                                                                                            | China                                                                                 | South Korea | C |
| 2013 | Lo [159]              | Complete sequence of an IncN plasmid, pIMP-HZ1, carrying blaIMP-4 in a Klebsiella pneumoniae strain associated with medical travel to China                                | Klebsiella pneumoniae                                                               | chloramphenicol, ertapenem, imipenem, meropenem, nitrofurantoin, TMP-SMZ and beta-lactams                                                                                                                                              | China                                                                                 | Hong-Kong   | C |
| 2013 | Mawatari [165]        | Salmonella enterica serotype Paratyphi A carrying CTX-M-15 type extended-spectrum beta-lactamase isolated from a Japanese traveller returning from India, Japan, July 2013 | Salmonella enterica serotype Paratyphi A                                            | ampicillin, amoxicillin/clavulanic acid, aztreonam, cefotaxime, ceftazidime, ceftriaxone, ciprofloxacin, levofloxacin, nalidixic acid and TMP-SMZ                                                                                      | India                                                                                 | Japan       | B |
| 2013 | Östholm-Balkhed [189] | Travel-associated faecal colonization with ESBL-producing Enterobacteriaceae: incidence and risk factors                                                                   | Enterobacter cloacae, Escherichia coli, Klebsiella pneumoniae, and Proteus vulgaris | amikacin, amoxicillin/clavulanic acid, cefepime, cefotaxime, ceftazidime, ciprofloxacin, fosfomycin, gentamicin, mecillinam, nitrofurantoin, piperacillin/tazobactam, temocillin, tigecycline, TMP-SMZ, tobramycin and/or beta-lactams | North Africa, Sub-Saharan Africa, Central America, South America, South Asia and Asia | Sweden      | B |



|      |                  |                                                                                                                      |                                                            |                                                                                                                                                                                           |                                                                                                                                     |             |   |
|------|------------------|----------------------------------------------------------------------------------------------------------------------|------------------------------------------------------------|-------------------------------------------------------------------------------------------------------------------------------------------------------------------------------------------|-------------------------------------------------------------------------------------------------------------------------------------|-------------|---|
| 2013 | Paltansing [192] | Extended-spectrum $\beta$ -lactamase-producing Enterobacteriaceae among travelers from the Netherlands               | Enterobacteriaceae                                         | beta-lactams                                                                                                                                                                              | North Africa, Sub-Saharan Africa, Central America, South America, Southeast Asia, East Asia, South Asia, Central Asia and West Asia | Netherlands | C |
| 2013 | Pons [200]       | Antimicrobial resistance in <i>Shigella</i> spp. causing traveller's diarrhoea (1995-2010): a retrospective analysis | <i>Shigella</i> spp.                                       | ampicillin, amoxicillin/clavulanic acid, ciprofloxacin, Chloramphenicol, nalidixic acid, tetracycline and TMP-SMZ                                                                         | North Africa, Sub-Saharan Africa, Central America, South America, Southeast Asia, East Asia, South Asia, Central Asia and West Asia | Spain       | B |
| 2013 | Rogers [210]     | Treatment options for new delhi metallo-beta-lactamase-harboring Enterobacteriaceae                                  | <i>Escherichia coli</i>                                    | amikacin, aztreonam, cefotaxime, ceftazidime, ciprofloxacin, chloramphenicol, doripenem, fosfomicin, gentamicin, imipenem, meropenem, nitrofurantoin, piperacillin/tazobactam and TMP-SMZ | India                                                                                                                               | Australia   | C |
| 2013 | Wang [254]       | Carbapenem resistant Enterobacteriaceae carrying New Delhi metallo- $\beta$ -lactamase gene (NDM-1) in Taiwan        | <i>Klebsiella pneumoniae</i> and <i>Klebsiella oxytoca</i> | Amikacin, aztreonam, cefepime, ceftazidime, ciprofloxacin, doripenem, ertapenem, imipenem and meropenem                                                                                   | India and China                                                                                                                     | Taiwan      | C |

|      |               |                                                                                                                                   |                                                                                                                                                          |                                                                                                                                                |                                                                                                       |             |   |
|------|---------------|-----------------------------------------------------------------------------------------------------------------------------------|----------------------------------------------------------------------------------------------------------------------------------------------------------|------------------------------------------------------------------------------------------------------------------------------------------------|-------------------------------------------------------------------------------------------------------|-------------|---|
| 2014 | Ageevets [36] | Emergence of carbapenemase-producing gram-negative bacteria in Saint Petersburg, Russia                                           | Klebsiella pneumoniae                                                                                                                                    | aztreonam, biapenem, cefepime, ciprofloxacin, cefepime/clavulanic acid, ertapenem, fosfomycin, gentamicin, imipenem, meropenem and polymyxin B | Vietnam                                                                                               | Russia      | B |
| 2014 | Barlow [50]   | Travel-associated antimicrobial drug-resistant nontyphoidal Salmonellae, 2004–2009                                                | Salmonella enterica spp. (Non-Typhoidal Serotypes)                                                                                                       | ampicillin, ceftriaxone, ciprofloxacin, gentamicin or TMP-SMZ                                                                                  | Canada, Mexico, Africa, Central America, South America, East Asia, Southeast Asia, Europe and Oceania | USA         | B |
| 2014 | Birgand [54]  | Introduction of highly resistant bacteria into a hospital via patients repatriated or recently hospitalized in a foreign country  | Acinetobacter baumannii, Escherichia coli, Staphylococcus aureus, Enterococcus faecium, Enterobacter cloacae, Klebsiella pneumoniae and Proteus rettgeri | methicillin, beta-lactams, highly drug-resistant, Carbapenem-resistant and Glycopeptide-resistant                                              | Algeria, Australia, Ecuador, Italy, Kuwait, Mali, Morocco, Portugal, Tunisia, USA and Vietnam         | France      | B |
| 2014 | Bodilsen [57] | Mycotic aneurysm caused by Burkholderia pseudomallei in a previously healthy returning traveller                                  | Burkholderia pseudomallei                                                                                                                                | amoxicillin/clavulanate acid                                                                                                                   | Thailand                                                                                              | Denmark     | C |
| 2014 | Cha [66]      | Genetic diversity of Campylobacter jejuni isolates from Korea and travel-associated cases from east and southeast Asian countries | Campylobacter jejuni                                                                                                                                     | ciprofloxacin, nalidixic acid and tetracycline                                                                                                 | Indonesia, Philippines and China                                                                      | South Korea | C |

|      |                 |                                                                                                                                                               |                                                                                                                        |                                                                                                                                                       |                                                                                                                                                          |             |   |
|------|-----------------|---------------------------------------------------------------------------------------------------------------------------------------------------------------|------------------------------------------------------------------------------------------------------------------------|-------------------------------------------------------------------------------------------------------------------------------------------------------|----------------------------------------------------------------------------------------------------------------------------------------------------------|-------------|---|
| 2014 | Chua [71]       | The growing burden of multidrug-resistant infections among returned Australian travellers                                                                     | Klebsiella pneumoniae, Campylobacter spp., Comamonas spp., Pseudomonas aeruginosa and Escherichia coli                 | amikacin, amoxicillin/clavulanic acid, cefepime, ceftazidime, ceftriaxone, ciprofloxacin, gentamycin, meropenem, piperacillin/tazobactam, and TMP-SMZ | Afghanistan, Colombia, Croatia, Greece, India, Macedonia, Mauritius, Pakistan and Philippines                                                            | Australia   | B |
| 2014 | Gunell [100]    | Cefotaxime-resistant Salmonella enterica in travelers returning from Thailand to Finland                                                                      | Salmonella enterica spp. (including serotypes Typhimurium, Senftenberg, Heidelberg, Concord, Minnesota and Grumpensis) | cefotaxime, beta-lactams and quinolones                                                                                                               | China, Egypt, Ethiopia, Germany, India, Spain and Thailand                                                                                               | Finland     | B |
| 2014 | Hashimoto [107] | Isolation of OXA-48 carbapenemase-producing Klebsiella pneumoniae ST101 from an overseas traveler returning to Japan                                          | Klebsiella pneumoniae                                                                                                  | amikacin, aztreonam, ceftazidime, cefazolin, cefmetazole, cefotaxime, gentamicin, imipenem/cilastatin, levofloxacin and piperacillin                  | Egypt and Turkey                                                                                                                                         | Japan       | B |
| 2014 | Hassing [108]   | Salmonella subtypes with increased MICs for azithromycin in travelers returned to The Netherlands                                                             | Salmonella enterica serotype Typhi and Salmonella enterica Paratyphi                                                   | azithromycin and ciprofloxacin                                                                                                                        | Africa, East Asia, South Asia, Southeast Asia, West Asia and Europe                                                                                      | Netherlands | C |
| 2014 | Hopkins [27]    | In vitro activity of rifaximin against clinical isolates of Escherichia coli and other enteropathogenic bacteria isolated from travellers returning to the UK | Escherichia coli, Shigella spp., Campylobacter spp., Salmonella enterica spp. (serotypes Typhi, Paratyphi and others)  | azithromycin, ciprofloxacin, doxycycline, rifaximin, rifampicin and TMP-SMZ                                                                           | North Africa, Sub-Saharan Africa, Central Asia, East Asia, South Asia, Southeast Asia, West Asia, Central America, South America, Europe and unspecified | UK          | A |

|      |                 |                                                                                                                                                                 |                                          |                                            |                                                                                                                                                                                                                      |                                                      |   |
|------|-----------------|-----------------------------------------------------------------------------------------------------------------------------------------------------------------|------------------------------------------|--------------------------------------------|----------------------------------------------------------------------------------------------------------------------------------------------------------------------------------------------------------------------|------------------------------------------------------|---|
| 2014 | Jorgensen [132] | High prevalence of faecal carriage of ESBL-producing Enterobacteriaceae in Norwegian patients with gastroenteritis                                              | Enterobacteriaceae                       | beta-lactams                               | India, Pakistan, Africa, America, Asia and Europe                                                                                                                                                                    | Norway                                               | A |
| 2014 | Meltzer [167]   | A large outbreak of Salmonella Paratyphi A infection among Israeli travelers to Nepal                                                                           | Salmonella enterica serotype Paratyphi A | nalidixic acid                             | Nepal                                                                                                                                                                                                                | Israel                                               | C |
| 2014 | Nurjadi [20] +  | Emergence of trimethoprim resistance gene dfrG in Staphylococcus aureus causing human infection and colonization in sub-Saharan Africa and its import to Europe | Staphylococcus aureus                    | Trimethoprim, Sulfamethoxazole and TMP-SMZ | Cameroon, Cape Verde, Democratic Republic of Congo, Gambia, Germany, Ghana, Guinea-Bissau, Kenya, Malawi, Mozambique, Nigeria, Rwanda, Senegal, Sierra Leone, South Africa, Sudan, Tanzania, Togo, Uganda and Zambia | France, Germany, Netherlands, Europe and unspecified | B |
| 2014 | O'Donnell [185] | Quinolone-resistant Salmonella enterica Serotype Enteritidis infections associated with international travel                                                    | Salmonella enterica serotype Enteritidis | nalidixic acid                             | China, Dominican Republic, France, Germany, Greece, India, Mexico, Philippines, Poland, Russia, Spain, UK and unspecified                                                                                            | USA                                                  | A |
| 2014 | Ricotta [207]   | Epidemiology and antimicrobial resistance of international travel-associated Campylobacter infections in the United states, 2005-2011                           | Campylobacter spp.                       | quinolones and macrolides                  | China, Mexico, Sub-Saharan Africa, Central America, North America, South America, Asia and Europe                                                                                                                    | USA                                                  | B |

|      |                        |                                                                                                                                                                             |                                                                                                                           |                              |                                                                                                                                                                                                |             |   |
|------|------------------------|-----------------------------------------------------------------------------------------------------------------------------------------------------------------------------|---------------------------------------------------------------------------------------------------------------------------|------------------------------|------------------------------------------------------------------------------------------------------------------------------------------------------------------------------------------------|-------------|---|
| 2014 | Sole [228]             | Extended spectrum $\beta$ -lactamase-producing <i>Escherichia coli</i> faecal carriage in Spanish travellers returning from tropical and subtropical countries              | <i>Escherichia coli</i>                                                                                                   | beta-lactams                 | Burkina Faso, Cameroon, Congo, Egypt, Equatorial Guinea, Ghana, Guatemala, India, Indonesia, Malaysia, Mali, Mexico, Morocco, Mozambique, Myanmar, Nepal, Nigeria, Peru, Senegal and Venezuela | Spain       | B |
| 2014 | von Wintersdorff [252] | High rates of antimicrobial drug resistance gene acquisition after international travel, the Netherlands                                                                    | Enterobacteriaceae                                                                                                        | beta-lactams                 | Bangladesh, Bhutan, India, Nepal, Pakistan, Sri Lanka, North Africa, Sub-Saharan Africa, Central America, South America, South Asia, Southeast Asia and Europe                                 | Netherlands | B |
| 2014 | Yaita [260]            | Epidemiology of extended-spectrum $\beta$ -lactamase producing <i>Escherichia coli</i> in the stools of returning Japanese travelers, and the risk factors for colonization | <i>Escherichia coli</i>                                                                                                   | beta-lactams                 | India, Asia and Europe                                                                                                                                                                         | Japan       | B |
| 2015 | Allyn [43]             | Delayed diagnosis of high drug-resistant microorganisms carriage in repatriated patients: three cases in a French intensive care unit                                       | <i>Enterobacter aerogenes</i> , <i>Acinetobacter baumannii</i> , <i>Klebsiella pneumoniae</i> and <i>Escherichia coli</i> | carbapenems and beta-lactams | Madagascar                                                                                                                                                                                     | France      | C |

|      |            |                                                                                                                                                |                                                                                                                                                    |                                                           |                                                                                                                                                                                                                                                                                                   |                          |   |
|------|------------|------------------------------------------------------------------------------------------------------------------------------------------------|----------------------------------------------------------------------------------------------------------------------------------------------------|-----------------------------------------------------------|---------------------------------------------------------------------------------------------------------------------------------------------------------------------------------------------------------------------------------------------------------------------------------------------------|--------------------------|---|
| 2015 | Angue [46] | Risk factors for colonization with multidrug-resistant bacteria among patients admitted to the intensive care unit after returning from abroad | Escherichia coli, Klebsiella spp., Enterobacter spp., Acinetobacter baumannii, Pseudomonas aeruginosa, Enterobacteriaceae or Staphylococcus aureus | ceftazidime, methicillin, beta-lactams and/or carbapenems | Canada, China, Comoros, India, Madagascar, Mauritius, Southeast Asia or Europe                                                                                                                                                                                                                    | France                   | C |
| 2015 | Artzi [48] | Recurrent furunculosis in returning travelers: Newly defined entity                                                                            | Staphylococcus aureus                                                                                                                              | methicillin                                               | Argentina, Bolivia, Brazil, Chile, China, Costa Rica, Guatemala, Haiti, India, Laos, Mexico, Nicaragua, Panama, Peru, Sri Lanka, Thailand or Vietnam                                                                                                                                              | Israel                   | B |
| 2015 | Baker [49] | Intercontinental dissemination of azithromycin-resistant shigellosis through sexual transmission: a cross-sectional study                      | Shigella flexneri                                                                                                                                  | azithromycin                                              | Algeria, Bangladesh, Burkina Faso, Cambodia, Democratic Republic of the Congo, Vietnam, Egypt, French Guiana, Ghana, India, Kenya, Maldives, Mali, Mexico, Morocco, Myanmar, Niger, Nigeria, Pakistan, Peru, South Africa, Tanzania, Togo, Uganda, Africa, Asia, Central America or South America | UK, France and Australia | C |

|      |                      |                                                                                                                                                                                                                                           |                                                                                                              |                                                                                                                                   |                                                                                                                                                      |             |   |
|------|----------------------|-------------------------------------------------------------------------------------------------------------------------------------------------------------------------------------------------------------------------------------------|--------------------------------------------------------------------------------------------------------------|-----------------------------------------------------------------------------------------------------------------------------------|------------------------------------------------------------------------------------------------------------------------------------------------------|-------------|---|
| 2015 | Bengtsson-Palme [52] | The Human Gut Microbiome as a Transporter of Antibiotic Resistance Genes between Continents                                                                                                                                               | Escherichia coli                                                                                             | beta-lactams                                                                                                                      | India, Sri Lanka or Nepal                                                                                                                            | Sweden      | C |
| 2015 | Bowen [60]           | Importation and domestic transmission of Shigella sonnei resistant to ciprofloxacin - United States, May 2014-February 2015                                                                                                               | Shigella sonnei                                                                                              | ampicillin, azithromycin, ciprofloxacin, nalidixic acid, streptomycin, sulfisoxazole, tetracycline and/or TMP-SMZ                 | Dominican Republic, Haiti, India, Morocco, Asia or Europe                                                                                            | USA         | C |
| 2015 | Epelboin [85]        | High rate of multidrug-resistant gram-negative bacilli carriage and infection in hospitalized returning travelers: A cross-sectional cohort study                                                                                         | Escherichia coli, Pseudomonas taiwanensis, Citrobacter braakii, Klebsiella oxytoca and Klebsiella pneumoniae | beta-lactams                                                                                                                      | Algeria, China, Côte d'Ivoire, Greece, Guadeloupe, Guinea, India, Malaysia, Mali, Nepal, Russia, Senegal, Spain, Tanzania, Thailand, Ukraine and USA | France      | C |
| 2015 | FitzGerald [92]      | Non-toxigenic penicillin-resistant cutaneous C. diphtheriae infection: A case report and review of the literature                                                                                                                         | Corynebacterium diphtheriae                                                                                  | penicillin                                                                                                                        | Ethiopia                                                                                                                                             | UK          | C |
| 2015 | Hendriksen [114]     | Genomic dissection of travel-associated extended-spectrum-beta-lactamase-producing Salmonella enterica serovar typhi isolates originating from the Philippines: A one-off occurrence or a threat to effective treatment of typhoid fever? | Salmonella enterica serotype Typhi                                                                           | ampicillin, cefotaxime, cefpodoxime, ceftazidime, ceftiofur, ceftriaxone, gentamicin, streptomycin, tetracycline and trimethoprim | Philippines                                                                                                                                          | Netherlands | C |

|      |               |                                                                                                                        |                                                                               |                                                                                                                                                                                      |                                                                                                                                                        |             |   |
|------|---------------|------------------------------------------------------------------------------------------------------------------------|-------------------------------------------------------------------------------|--------------------------------------------------------------------------------------------------------------------------------------------------------------------------------------|--------------------------------------------------------------------------------------------------------------------------------------------------------|-------------|---|
| 2015 | Huber [119]   | Primary skin melioidosis in a returning traveler                                                                       | Burkholderia pseudomallei                                                     | TMP-SMZ                                                                                                                                                                              | Thailand                                                                                                                                               | Germany     | A |
| 2015 | Kantele [134] | Antimicrobials increase travelers risk of colonisation by extended-spectrum betalactamase-producing Enterobacteriaceae | Enterobacteriaceae                                                            | beta-lactams                                                                                                                                                                         | North Africa, Sub-Saharan Africa, East Asia, South Asia, Southeast Asia and West Asia                                                                  | Finland     | B |
| 2015 | Kaspar [137]  | Colonization with resistant microorganisms in patients transferred from abroad: Who needs to be screened?              | Staphylococcus aureus or Gram-negative bacteria                               | ceftazidime, cefotaxime, methicillin, beta-lactams and/or carbapenems                                                                                                                | France, Italy, Spain, Switzerland, Africa, Americas, Asia, Europe and unspecified                                                                      | Switzerland | A |
| 2015 | Kim [140]     | Outbreak of ciprofloxacin-resistant Shigella sonnei associated with travel to Vietnam, Republic of Korea               | Shigella sonnei                                                               | ampicillin, ampicillin/sulbactam, amoxicillin/clavulanate, cefotaxime, ceftazidime, ceftriaxone, cephalothin, ciprofloxacin, nalidixic acid, streptomycin, tetracycline and TMP-SMZ. | Vietnam                                                                                                                                                | South Korea | C |
| 2015 | Lane [150]    | Travel destinations and sexual behavior as indicators of antibiotic resistant Shigella strains - Victoria, Australia   | Shigella sonnei, Shigella flexneri, Shigella boydii, and Shigella dysenteriae | ampicillin, ciprofloxacin, nalidixic acid, spectinomycin, streptomycin, sulphathiozole, tetracycline and trimethoprim                                                                | India, Indonesia, Thailand, North Africa, Sub-Sahara Africa, Americas, Central Asia, Southern Asia, Southeast Asia, West Asia, Oceania and unspecified | Australia   | A |



|      |                    |                                                                                                                                                             |                                            |                                                                                                                                                                                                                                                                           |                                                                                                                                                                                                                                                                                                                                                                                                                                                                                                                                      |         |   |
|------|--------------------|-------------------------------------------------------------------------------------------------------------------------------------------------------------|--------------------------------------------|---------------------------------------------------------------------------------------------------------------------------------------------------------------------------------------------------------------------------------------------------------------------------|--------------------------------------------------------------------------------------------------------------------------------------------------------------------------------------------------------------------------------------------------------------------------------------------------------------------------------------------------------------------------------------------------------------------------------------------------------------------------------------------------------------------------------------|---------|---|
| 2015 | Lubbert<br>[160] + | Colonisation with extended-spectrum beta-lactamase-producing and carbapenemase-producing Enterobacteriaceae in international travelers returning to Germany | Escherichia coli and Klebsiella pneumoniae | amikacin, ampicillin/sulbactam, aztreonam, ceftazidime, ceftibuten, ciprofloxacin, colistin, doripenem, doxycycline, ertapenem, fosfomycin, gentamicin, levofloxacin, imipenem, meropenem, moxifloxacin, piperacillin/tazobactam, tigecycline, tobramycin, and/or TMP-SMZ | Argentina, Benin, Bolivia, Botswana, Brazil, Cambodia, Cameroon, Chile, China, Colombia, Democratic Republic of the Congo, Costa Rica, Côte d'Ivoire, Cuba, Ecuador, Ethiopia, Fiji, France, Ghana, Guatemala, India, Indonesia, Italy, Kenya, Laos, Malaysia, Mexico, Moldova, Mozambique, Myanmar, Namibia, Nepal, New Zealand, Nicaragua, Panama, Paraguay, Peru, Philippines, Portugal, Seychelles, Singapore, South Africa, Sri Lanka, Swaziland, Tanzania, Thailand, Togo, Turkey, Uganda, USA, Venezuela, Vietnam or Zimbabwe | Germany | B |
|------|--------------------|-------------------------------------------------------------------------------------------------------------------------------------------------------------|--------------------------------------------|---------------------------------------------------------------------------------------------------------------------------------------------------------------------------------------------------------------------------------------------------------------------------|--------------------------------------------------------------------------------------------------------------------------------------------------------------------------------------------------------------------------------------------------------------------------------------------------------------------------------------------------------------------------------------------------------------------------------------------------------------------------------------------------------------------------------------|---------|---|

|      |                         |                                                                                                                                                                                              |                                                                                                                                                                                                       |                                                                                                                                                                     |                                                                                                                                   |             |   |
|------|-------------------------|----------------------------------------------------------------------------------------------------------------------------------------------------------------------------------------------|-------------------------------------------------------------------------------------------------------------------------------------------------------------------------------------------------------|---------------------------------------------------------------------------------------------------------------------------------------------------------------------|-----------------------------------------------------------------------------------------------------------------------------------|-------------|---|
| 2015 | Mutters [178]           | Influx of multidrug-resistant organisms by country-to-country transfer of patients                                                                                                           | Acinetobacter baumannii, Enterobacter cloacae, Enterococcus faecium, Escherichia coli, Klebsiella pneumoniae, Klebsiella oxytoca, Proteus mirabilis, Pseudomonas aeruginosa and Staphylococcus aureus | methicillin, vancomycin, beta-lactams and/or carbapenams                                                                                                            | Russia, Sub-Saharan Africa, North Africa, West Asia, Asia or Europe                                                               | Germany     | C |
| 2015 | Nuesch-Inderbinen [183] | Antimicrobial susceptibility of travel-related Salmonella enterica serovar Typhi isolates detected in Switzerland (2002–2013) and molecular characterization of quinolone resistant isolates | Salmonella enterica serotype Typhi                                                                                                                                                                    | ampicillin, amoxicillin/clavulanic acid, cephalothin, chloramphenicol, ciprofloxacin, nalidixic acid, streptomycin, sulfamethoxazole, tetracycline and trimethoprim | Australia, Bangladesh, Cambodia, Costa Rica, India, Lebanon, Mexico, Nepal, Niger, Pakistan, Sri Lanka, Tanzania, Africa and Asia | Switzerland | C |

|      |                 |                                                                                                                                        |                              |                                                                                 |                                                                                                                                                                                                                                                                                                                                                                                                                                                                                                                                                                                                                          |        |   |
|------|-----------------|----------------------------------------------------------------------------------------------------------------------------------------|------------------------------|---------------------------------------------------------------------------------|--------------------------------------------------------------------------------------------------------------------------------------------------------------------------------------------------------------------------------------------------------------------------------------------------------------------------------------------------------------------------------------------------------------------------------------------------------------------------------------------------------------------------------------------------------------------------------------------------------------------------|--------|---|
| 2015 | Nurjadi<br>[21] | Skin and soft tissue infection in intercontinental travellers and the import of multi-resistant <i>Staphylococcus aureus</i> to Europe | <i>Staphylococcus aureus</i> | ciprofloxacin, clindamycin, erythromycin, methicillin, tetracycline and TMP-SMZ | Australia, Bahamas, Benin, Brazil, Burundi, Cambodia, Cameroon, Cape Verde, Columbia, Democratic Republic of Congo, Republic of Congo, Costa Rica, Cuba, Dominican Republic, Ecuador, Equatorial Guinea, Fiji, Gambia, Ghana, Guinea, Haiti, India, Indonesia, Jamaica, Kenya, Laos, Madagascar, Malawi, Malaysia, Mexico, Morocco, Mozambique, Namibia, Nepal, New Zealand, Nicaragua, Niger, Nigeria, Pakistan, Panama, Papua New Guinea, Paraguay, Peru, Philippines, Rwanda, Senegal, Sierra Leone, Singapore, South Africa, Sri Lanka, Sudan, Surinam, Tanzania, Thailand, Togo, Tunisia, Uganda, Vietnam or Zambia | Europe | C |
|------|-----------------|----------------------------------------------------------------------------------------------------------------------------------------|------------------------------|---------------------------------------------------------------------------------|--------------------------------------------------------------------------------------------------------------------------------------------------------------------------------------------------------------------------------------------------------------------------------------------------------------------------------------------------------------------------------------------------------------------------------------------------------------------------------------------------------------------------------------------------------------------------------------------------------------------------|--------|---|

|      |                      |                                                                                                                                      |                                   |                                                                                                                           |                                                                                                                                                                                                                                                                                                                                                             |                                                                     |   |
|------|----------------------|--------------------------------------------------------------------------------------------------------------------------------------|-----------------------------------|---------------------------------------------------------------------------------------------------------------------------|-------------------------------------------------------------------------------------------------------------------------------------------------------------------------------------------------------------------------------------------------------------------------------------------------------------------------------------------------------------|---------------------------------------------------------------------|---|
| 2015 | Nurjadi [22]         | Predominance of dfrG as determinant of trimethoprim resistance in imported <i>Staphylococcus aureus</i>                              | <i>Staphylococcus aureus</i>      | trimethoprim and TMP-SMZ                                                                                                  | Germany and the same as the above, Nurjadi et. al., 2015.                                                                                                                                                                                                                                                                                                   | Europe                                                              | B |
| 2015 | Ruppe [212] +        | High rate of acquisition but short duration of carriage of multidrug-resistant <i>Enterobacteriaceae</i> after travel to the tropics | <i>Enterobacteriaceae</i>         | beta-lactams                                                                                                              | Angola, Argentina, Bangladesh, Benin, Bolivia, Brazil, Burkina Faso, Cambodia, Cameroon, China, Congo, Costa Rica, Ecuador, Ethiopia, French Guyana, Gabon, Ghana, Guinea, India, Indonesia, Ivory Coast, Kenya, Laos, Madagascar, Malaysia, Mali, Mexico, Myanmar, Nepal, Niger, Peru, Senegal, Sri Lanka, Tanzania, Thailand, Togo, Venezuela and Vietnam | France, Sub-Saharan Africa, Central America, South America and Asia | B |
| 2015 | Salazar-Austin [215] | Extensively drug-resistant tuberculosis in a young child after travel to India                                                       | <i>Mycobacterium tuberculosis</i> | amikacin, ethambutol, isoniazid, kanamycin, moxifloxacin, ofloxacin, pyrazinamide, rifabutin, rifampicin and streptomycin | India                                                                                                                                                                                                                                                                                                                                                       | USA                                                                 | C |

|      |                  |                                                                                                                                                                                                         |                                                                                               |                                                                                                                                                                                                          |                                                                                                                                                                                     |                |   |
|------|------------------|---------------------------------------------------------------------------------------------------------------------------------------------------------------------------------------------------------|-----------------------------------------------------------------------------------------------|----------------------------------------------------------------------------------------------------------------------------------------------------------------------------------------------------------|-------------------------------------------------------------------------------------------------------------------------------------------------------------------------------------|----------------|---|
| 2015 | Shin [223]       | First report and molecular characterization of a <i>Campylobacter jejuni</i> isolate with extensive drug resistance from a travel-associated human case                                                 | <i>Campylobacter jejuni</i>                                                                   | amikacin, ampicillin, azithromycin, cefotaxime, ceftazidime, chloramphenicol, ciprofloxacin, clindamycin, enrofloxacin, erythromycin, gentamicin, nalidixic acid, streptomycin and tetracycline          | Philippines                                                                                                                                                                         | South Korea    | A |
| 2015 | Tojo [241]       | Multidrug-resistant <i>Acinetobacter baumannii</i> isolated from a traveler returned from Brunei                                                                                                        | <i>Acinetobacter baumannii</i>                                                                | amikacin, arbekacin, aztreonam, cefepime, cefotaxime, ceftazidime, cephadrine, ciprofloxacin, colistin, fosfomicin, gentamicin, imipenem, meropenem, ofloxacin, piperacillin and piperacillin/tazobactam | Brunei                                                                                                                                                                              | Japan          | C |
| 2015 | Trojanek [242]   | Enteric fever imported to the Czech Republic: epidemiology, clinical characteristics and antimicrobial susceptibility                                                                                   | <i>Salmonella enterica</i> serotype Typhi and <i>Salmonella enterica</i> serotype Paratyphi A | amikacin, ciprofloxacin, chloramphenicol and TMP-SMZ                                                                                                                                                     | Angola, India and Nepal                                                                                                                                                             | Czech Republic | C |
| 2015 | Valverde [245]   | CTX-M-15-non-ST131 <i>Escherichia coli</i> isolates are mainly responsible of faecal carriage with ESBL-producing Enterobacteriaceae in travellers, immigrants and those visiting friends and relatives | <i>Escherichia coli</i>                                                                       | amikacin, ciprofloxacin, gentamycin, nalidixic acid, sulfonamide, tobramycin, TMP-SMZ, trimethoprim and beta-lactams                                                                                     | Angola, Bolivia, Cambodia, Colombia, Cuba, Dominican Republic, Ecuador, Ethiopia, Guatemala, India, Indonesia, Kenya, Mali, Nepal, Peru, Philippines, Sudan, Thailand and Venezuela | Spain          | B |
| 2016 | Ahmad Hatib [37] | Enteric fever in a tertiary paediatric hospital: A retrospective six-year review                                                                                                                        | <i>Salmonella enterica</i> serotype Typhi                                                     | ampicillin, ciprofloxacin and/or TMP-SMZ                                                                                                                                                                 | Bangladesh, India, Indonesia, Malaysia, Nepal or Pakistan                                                                                                                           | Singapore      | C |

|      |                    |                                                                                                                                                                         |                                                                                 |                                                                                                                                                        |                                                                                                                                                                                                                                                  |                       |   |
|------|--------------------|-------------------------------------------------------------------------------------------------------------------------------------------------------------------------|---------------------------------------------------------------------------------|--------------------------------------------------------------------------------------------------------------------------------------------------------|--------------------------------------------------------------------------------------------------------------------------------------------------------------------------------------------------------------------------------------------------|-----------------------|---|
| 2016 | Bernasconi [53] +  | Travelers can import colistin-resistant Enterobacteriaceae, including those possessing the plasmid-mediated mcr-1 gene                                                  | Escherichia coli, Klebsiella pneumoniae and Proteus mirabilis                   | colistin, polymyxin B and cephalosporins                                                                                                               | India and Switzerland                                                                                                                                                                                                                            | India and Switzerland | B |
| 2016 | Date [76]          | Changing patterns in enteric fever incidence and increasing antibiotic resistance of enteric fever isolates in the United States, 2008-2012                             | Salmonella enterica serotype Typhi and Salmonella enterica serotype Paratyphi A | ampicillin, ceftriaxone, chloramphenicol, ciprofloxacin, nalidixic acid and TMP-SMZ                                                                    | Bangladesh, Brazil, Burundi, Cambodia, China, El Salvador, Ghana, Guatemala, Guinea, Haiti, Iceland, India, Iraq, Lebanon, Liberia, Mali, Mexico, Nepal, Nigeria, Pakistan, Philippines, Sri Lanka, Tanzania, Togo, Zimbabwe and Central America | USA                   | C |
| 2016 | Frickmann [96]     | Low enteric colonization with multidrug-resistant pathogens in Soldiers returning from deployments - Experience from the years 2007–2015                                | Escherichia coli and Enterococcus faecalis                                      | ciprofloxacin, gentamycin, levofloxacin, nitrofurantoin, streptomycin, teicoplanin, TMP-SMZ, vancomycin, beta-lactams and cephalosporins               | Afghanistan, Democratic Republic of Congo, Djibouti, Ghana, Lebanon, Mali, Nigeria, South Sudan, Sub-Saharan Africa, Sudan, Tanzania, Thailand, Uganda, Uzbekistan and unspecified                                                               | Germany               | C |
| 2016 | Herrera-Leon [115] | Plasmid-mediated quinolone resistance in different diarrheagenic Escherichia coli pathotypes responsible for complicated, noncomplicated, and traveler's diarrhea cases | Escherichia coli                                                                | ampicillin, amoxicillin/clavulanic acid, cefotaxime, cephalothin, chloramphenicol, ciprofloxacin, tetracycline, streptomycin, TMP-SMZ and sulfonamides | Mexico and Southeast Asia                                                                                                                                                                                                                        | Spain                 | C |

|      |             |                                                                                                                                      |                                                                                       |                                                                                                                                                                                                                            |                                                                                                                                                                                                                                                                                       |        |   |
|------|-------------|--------------------------------------------------------------------------------------------------------------------------------------|---------------------------------------------------------------------------------------|----------------------------------------------------------------------------------------------------------------------------------------------------------------------------------------------------------------------------|---------------------------------------------------------------------------------------------------------------------------------------------------------------------------------------------------------------------------------------------------------------------------------------|--------|---|
| 2016 | Jamal [128] | High prevalence of New Delhi metallo- $\beta$ -lactamase-1 (NDM-1) producers among carbapenem-resistant Enterobacteriaceae in Kuwait | Enterobacter cloacae, Escherichia coli, Klebsiella pneumoniae and Morganella morganii | amikacin, amoxicillin/clavulanic acid, cefepime, cefotaxime, ceftriaxone, ciprofloxacin, clarithromycin, colistin, imipenem, meropenem, metronidazole, nitrofurantoin, piperacillin/tazobactam, tigecycline and vancomycin | Egypt, Jordan, Syria, USA, Iran and India                                                                                                                                                                                                                                             | Kuwait | B |
| 2016 | Kong [147]  | Melioidosis acquired by a traveler from Papua New Guinea                                                                             | Burkholderia pseudomallei                                                             | ampicillin, ciprofloxacin, gentamicin, tobramycin and piperacillin/tazobactam                                                                                                                                              | Papua New Guinea                                                                                                                                                                                                                                                                      | China  | C |
| 2016 | Li [157]    | Surveillance for travel and domestically acquired multidrug-resistant human Shigella infections - Pennsylvania, 2006-2014            | Shigella flexneri, Shigella sonnei, Shigella boydii, and Shigella dysenteriae         | ampicillin, amoxicillin/clavulanic acid, cefoxitin, ceftiofur, ceftriaxone, chloramphenicol, ciprofloxacin, gentamicin, nalidixic acid, streptomycin, sulfisoxazole, tetracycline and TMP-SMZ                              | Aruba, Belize, Burundi, Canada, China, Colombia, Costa Rica, Dominican Republic, Ecuador, Egypt, El Salvador, France, Ghana, Guatemala, Haiti, Hawaii, Honduras, India, Iraq, Israel, Jamaica, Mexico, Morocco, Nepal, Nicaragua, Niger, Nigeria, Pakistan, Panama, Peru and Thailand | USA    | B |

|      |                |                                                                                                                            |                                                                                                                    |                                                                                                                                                              |                                                                                                                                                                                      |              |   |
|------|----------------|----------------------------------------------------------------------------------------------------------------------------|--------------------------------------------------------------------------------------------------------------------|--------------------------------------------------------------------------------------------------------------------------------------------------------------|--------------------------------------------------------------------------------------------------------------------------------------------------------------------------------------|--------------|---|
| 2016 | Mataseje [164] | Colistin-nonsusceptible <i>Pseudomonas aeruginosa</i> sequence Type 654 with blaNDM-1 arrives in North America             | <i>Escherichia coli</i> , <i>Providencia rettgeri</i> and <i>Pseudomonas aeruginosa</i>                            | amikacin, cefepime, ceftazidime, ceftriaxone, ciprofloxacin, colistin, ertapenem, gentamicin, meropenem, piperacillin/tazobactam, tigecycline and tobramycin | India                                                                                                                                                                                | Canada       | A |
| 2016 | Reuland [206]  | Prevalence and risk factors for carriage of ESBL-producing Enterobacteriaceae in Amsterdam                                 | <i>Enterobacter cloacae</i> , <i>Escherichia coli</i> , <i>Klebsiella pneumoniae</i> or <i>Serratia plymuthica</i> | beta-lactams, ciprofloxacin, gentamycin, nitrofurantoin and TMP-SMZ                                                                                          | Afghanistan, Canada, China, Egypt, India, Iran, Israel, Japan, Mongolia, Morocco, Sri Lanka, Turkey, UAE, USA, Sub-Saharan Africa, Central America, South America and Southeast Asia | Netherlands  | C |
| 2016 | Saitoh [214]   | Increase in paratyphoid fever cases in Japanese travellers returning from Cambodia in 2013                                 | <i>Salmonella enterica</i> serotype Paratyphi A                                                                    | nalidixic acid                                                                                                                                               | Cambodia                                                                                                                                                                             | Japan        | B |
| 2016 | Sekirov [219]  | Epidemiologic and genotypic review of carbapenemase-producing organisms in British Columbia, Canada, between 2008 and 2014 | <i>Enterobacter</i> spp., <i>Escherichia coli</i> and <i>Klebsiella pneumoniae</i>                                 | Carbapenem                                                                                                                                                   | Bangladesh, India and unspecified                                                                                                                                                    | Canada       | B |
| 2016 | Senok [220]    | Diversity of methicillin-resistant <i>Staphylococcus aureus</i> CC22-MRSA-IV from Saudi Arabia and the Gulf region         | <i>Staphylococcus aureus</i>                                                                                       | ampicillin, imipenem, methicillin and penicillin                                                                                                             | Egypt                                                                                                                                                                                | Saudi Arabia | A |



|      |                |                                                                                                                                                                                          |                                             |                                                                                                                                                                                     |                                                                                                |             |   |
|------|----------------|------------------------------------------------------------------------------------------------------------------------------------------------------------------------------------------|---------------------------------------------|-------------------------------------------------------------------------------------------------------------------------------------------------------------------------------------|------------------------------------------------------------------------------------------------|-------------|---|
| 2016 | Stryko [230]   | International travel is a risk factor for extended-spectrum $\beta$ -lactamase-producing Enterobacteriaceae acquisition in children: A case-case-control study in an urban U.S. hospital | Enterobacteriaceae                          | beta-lactams, ciprofloxacin, nitrofurantoin and/or TMP-SMZ                                                                                                                          | Bangladesh, Canada, China, Pakistan, Peru and Saudi Arabia                                     | USA         | B |
| 2016 | Talan [233]    | Fluoroquinolone-resistant and extended-spectrum $\beta$ -lactamase-producing Escherichia coli infections in patients with pyelonephritis, United States                                  | Escherichia coli                            | ampicillin, cefazolin, ceftriaxone, ciprofloxacin, levofloxacin, gentamicin, TMP-SMZ and/or beta-lactams                                                                            | Mexico, Central America and Asia                                                               | USA         | B |
| 2016 | Von Dach [251] | Comparative genomics of community-associated methicillin-resistant Staphylococcus aureus shows the emergence of clone ST8-USA300 in Geneva, Switzerland                                  | Staphylococcus aureus                       | ciprofloxacin, clindamycin, erythromycin, flucloxacillin/oxacillin, methicillin, penicillin G and tetracycline                                                                      | Bolivia, Brazil, Cameroon, Columbia, Cuba, Ecuador, Sierra Leone, Switzerland, Uruguay and USA | Switzerland | C |
| 2017 | Adelman [34]   | Ovarian endometrioma superinfected with Salmonella: Case report and review of the literature                                                                                             | Salmonella enterica serotype Schwarzengrund | ciprofloxacin and levofloxacin                                                                                                                                                      | UAE                                                                                            | USA         | C |
| 2017 | Ageevets [35]  | Genetic environment of the blaKPC-2 gene in a Klebsiella pneumoniae isolate that may have been imported to Russia from Southeast Asia                                                    | Klebsiella pneumoniae                       | ampicillin, aztreonam, biapenem, cefepime, cefotaxime, ceftazidime, ciprofloxacin, chloramphenicol, ertapenem, fosfomicin, gentamicin, imipenem, meropenem, polymyxin B and TMP-SMZ | Vietnam                                                                                        | Russia      | A |

|      |                |                                                                                                                                                                            |                                                                      |                                                                                                                                              |                                                                                                                                                                                                                                                                                                                                                                    |             |   |
|------|----------------|----------------------------------------------------------------------------------------------------------------------------------------------------------------------------|----------------------------------------------------------------------|----------------------------------------------------------------------------------------------------------------------------------------------|--------------------------------------------------------------------------------------------------------------------------------------------------------------------------------------------------------------------------------------------------------------------------------------------------------------------------------------------------------------------|-------------|---|
| 2017 | Arcilla [18]   | Import and spread of extended-spectrum $\beta$ -lactamase-producing Enterobacteriaceae by international travellers (COMBAT study): a prospective, multicentre cohort study | Enterobacteriaceae                                                   | beta-lactams                                                                                                                                 | Brazil, China, Egypt, Gambia, Ghana, India, Indonesia, Kenya, Malaysia, Mexico, Morocco, Myanmar, Nepal, Peru, South Africa, Sri Lanka, Suriname, Tanzania, Thailand, Turkey, Uganda, Vietnam, North Africa, Sub-Saharan Africa, Central America, North America, South America, Central Asia, East Asia, Southeast Asia, South Asia, West Asia, Europe and Oceania | Netherlands | B |
| 2017 | Blomfeldt [55] | Emerging multidrug-resistant Bengal Bay clone ST772-MRSA-V in Norway: molecular epidemiology 2004-2014                                                                     | Staphylococcus aureus                                                | cefoxitin, clindamycin, erythromycin, fusidic acid, gentamicin, methicillin, mupirocin, norfloxacin, rifampicin, tetracycline and/or TMP-SMZ | Africa, Asia, Europe and unspecified                                                                                                                                                                                                                                                                                                                               | Norway      | B |
| 2017 | Cusumano [73]  | Rapidly growing Mycobacterium infections after cosmetic surgery in medical tourists: the Bronx experience and a review of the literature                                   | Mycobacterium abscessus and Mycobacterium chelonae/abscessus complex | cefoxitin, imipenem/cilastatin, and linezolid                                                                                                | Dominican Republic                                                                                                                                                                                                                                                                                                                                                 | USA         | B |

|      |                |                                                                                                                                                             |                                                                                 |                                                                                                                             |                                                                                                                                                                                                                                     |         |   |
|------|----------------|-------------------------------------------------------------------------------------------------------------------------------------------------------------|---------------------------------------------------------------------------------|-----------------------------------------------------------------------------------------------------------------------------|-------------------------------------------------------------------------------------------------------------------------------------------------------------------------------------------------------------------------------------|---------|---|
| 2017 | Dave [77]      | What were the risk factors and trends in antimicrobial resistance for enteric fever in London 2005-2012?                                                    | Salmonella enterica serotype Typhi and Salmonella enterica serotype Paratyphi A | ampicillin, ciprofloxacin, chloramphenicol, nalidixic acid, sulphonamide, trimethoprim and TMP-SMZ                          | Bangladesh, India, Pakistan, Africa and Asia                                                                                                                                                                                        | UK      | B |
| 2017 | Day [78]       | Antimicrobial resistance in Shiga toxin-producing Escherichia coli serogroups O157 and O26 isolated from human cases of diarrhoeal disease in England, 2015 | Escherichia coli                                                                | chloramphenicol, aminoglycosides, beta-lactams, fluoroquinolones, macrolides, sulphonamides, tetracyclines and trimethoprim | Bangladesh, Belgium, India, Morocco, Portugal, Spain, Turkey, Europe and unspecified                                                                                                                                                | UK      | B |
| 2017 | Di Ruscio [81] | MRSA infections in Norway: A study of the temporal evolution, 2006-2015                                                                                     | Staphylococcus aureus                                                           | methicillin                                                                                                                 | Brazil, Cuba, Egypt, Eritrea, Ethiopia, Greece, India, Pakistan, Philippines, Poland, Somalia, Sri Lanka, Spain, Thailand, Turkey, UK, Africa, Central America, North America, South America, Asia, Europe, Oceania and unspecified | Norway  | C |
| 2017 | Ferstl [90]    | Severe infection with multidrug-resistant Salmonella Choleraesuis in a young patient with primary sclerosing cholangitis                                    | Salmonella enterica serotype Choleraesuis                                       | beta-lactams and fluoroquinolones                                                                                           | Thailand                                                                                                                                                                                                                            | Germany | B |
| 2017 | Geissler [97]  | Increasing Campylobacter infections, outbreaks, and antimicrobial resistance in the United States, 2004-2012                                                | Campylobacter spp.                                                              | ciprofloxacin and erythromycin                                                                                              | unspecified                                                                                                                                                                                                                         | USA     | C |

|      |                   |                                                                                                                                                                   |                                                                                                                                                       |                                                                                                                                                                                                                       |                                                                                                                                                       |          |   |
|------|-------------------|-------------------------------------------------------------------------------------------------------------------------------------------------------------------|-------------------------------------------------------------------------------------------------------------------------------------------------------|-----------------------------------------------------------------------------------------------------------------------------------------------------------------------------------------------------------------------|-------------------------------------------------------------------------------------------------------------------------------------------------------|----------|---|
| 2017 | Inkster [124]     | First outbreak of colonization by linezolid- and glycopeptide-resistant <i>Enterococcus faecium</i> harbouring the cfr gene in a UK nephrology unit               | <i>Enterococcus faecium</i> , <i>Escherichia coli</i> and <i>Pseudomonas aeruginosa</i>                                                               | linezolid and carbapenem                                                                                                                                                                                              | India                                                                                                                                                 | UK       | B |
| 2017 | Kantele [135]     | Fluoroquinolone antibiotic users select fluoroquinolone-resistant ESBL-producing <i>Enterobacteriaceae</i> (ESBL-PE) - Data of prospective traveller study        | <i>Enterobacteriaceae</i>                                                                                                                             | amoxicillin/clavulanic acid, ampicillin, cefalexin, cefepime, ceftazidime, ceftriaxone, cefuroxime, ciprofloxacin, colistin, ertapenem, levofloxacin, nitrofurantoin, piperacillin/tazobactam, TMP-SMZ and tobramycin | North Africa, Sub-Saharan Africa, East Asia, South Asia, Southeast Asia and West Asia                                                                 | Finland  | B |
| 2017 | Khawaja [139]     | Patients hospitalized abroad as importers of multiresistant bacteria - a cross-sectional study                                                                    | <i>Staphylococcus aureus</i> , <i>Acinetobacter baumannii</i> , <i>Pseudomonas aeruginosa</i> , <i>Enterococci</i> spp. and <i>Enterobacteriaceae</i> | ceftazidime, meropenem, methicillin, vancomycin, beta-lactams, carbapenems                                                                                                                                            | North Africa, Sub-Saharan Africa, East Asia, Southeast Asia, South Asia, West Asia, Central America, North America, South America, Europe and Oceania | Finland  | B |
| 2017 | Mischlinger [173] | Dalbavancin for outpatient parenteral antimicrobial therapy of skin and soft tissue infections in a returning traveller: Proposal for novel treatment indications | <i>Staphylococcus aureus</i>                                                                                                                          | methicillin                                                                                                                                                                                                           | China, Philippines and Singapore                                                                                                                      | Austria  | B |
| 2017 | Muchena [175]     | Determinants of multidrug resistance among previously treated tuberculosis patients in Zimbabwe, 2014                                                             | <i>Mycobacterium tuberculosis</i>                                                                                                                     | Isoniazid and rifampicin                                                                                                                                                                                              | Botswana, South Africa and Zambia                                                                                                                     | Zimbabwe | A |

|      |                |                                                                                                                                              |                                                                 |                                                                                                                                                                                               |                                                                                                                                                                                                                                                                                                                                           |         |   |
|------|----------------|----------------------------------------------------------------------------------------------------------------------------------------------|-----------------------------------------------------------------|-----------------------------------------------------------------------------------------------------------------------------------------------------------------------------------------------|-------------------------------------------------------------------------------------------------------------------------------------------------------------------------------------------------------------------------------------------------------------------------------------------------------------------------------------------|---------|---|
| 2017 | Ny [184]       | Community carriage of ESBL-producing <i>Escherichia coli</i> is associated with strains of low pathogenicity: A Swedish nationwide study.    | <i>Escherichia coli</i>                                         | amoxicillin/clavulanic acid, ampicillin, cefotaxime, ceftazidime, ciprofloxacin, colistin, fosfomycin, gentamicin, imipenem, mecillinam, piperacillin/tazobactam, tobramycin and beta-lactams | Denmark, Finland, Iceland, Norway, Sweden, Africa, North America, South America, Asia and/or Europe                                                                                                                                                                                                                                       | Sweden  | C |
| 2017 | Post [203]     | Antibiotic susceptibility profiles among <i>Campylobacter</i> isolates obtained from international travelers between 2007 and 2014           | <i>Campylobacter</i> spp.                                       | azithromycin, ciprofloxacin, erythromycin, levofloxacin and tetracycline                                                                                                                      | Burkina Faso, Cameroon, China, Cuba, DRC, Ethiopia, France, India, Indonesia, Morocco, Nepal, Nicaragua, Pakistan, Peru, Poland, Romania, South Africa, Spain, Tanzania, Tunis, Turkey, USA, North Africa, Sub-Saharan Africa, Central America, North America, South America, East Asia, South Asia, Southeast Asia, West Asia and Europe | Belgium | A |
| 2017 | Principe [204] | First report of NDM-1-producing <i>Klebsiella pneumoniae</i> imported from Africa to Italy: Evidence of the need for continuous surveillance | <i>Acinetobacter baumannii</i> and <i>Klebsiella pneumoniae</i> | amikacin, amoxicillin/clavulanic acid, cefepime, cefotaxime, ceftazidime, ciprofloxacin, ertapenem, gentamicin, imipenem, meropenem, piperacillin/tazobactam, TMP-SMZ and carbapenem          | Egypt                                                                                                                                                                                                                                                                                                                                     | Italy   | C |

|      |                     |                                                                                                                                                  |                                                                                                                                        |                                                                                           |                                                                                                                                                                                                               |         |   |
|------|---------------------|--------------------------------------------------------------------------------------------------------------------------------------------------|----------------------------------------------------------------------------------------------------------------------------------------|-------------------------------------------------------------------------------------------|---------------------------------------------------------------------------------------------------------------------------------------------------------------------------------------------------------------|---------|---|
| 2017 | Reinheimer<br>[205] | Prevalence of multidrug-resistant organisms in refugee patients, medical tourists and domestic patients admitted to a German university hospital | Acinetobacter baumannii, Escherichia coli, Klebsiella pneumoniae, Pseudomonas aeruginosa, Staphylococcus aureus and Enterobacteriaceae | methicillin, piperacillin, beta-lactams, carbapenems, cephalosporins and fluoroquinolones | Afghanistan, Algeria, Croatia, Egypt, Eritrea, Ethiopia, Ghana, Greek, Hungary, India, Iran, Iraq, Italy, Kuwait, Morocco, Nigeria, Saudi Arabia, Somalia, Spain, Sri Lanka, Thailand, Turkey and unspecified | Germany | C |
| 2017 | Rieber<br>[208]     | Molecular investigation of carbapenem-resistant Acinetobacter spp. from hospitals in North Rhine-Westphalia, Germany                             | Acinetobacter baumannii                                                                                                                | ciprofloxacin, gentamicin and carbapenms                                                  | Libya                                                                                                                                                                                                         | Germany | C |

|      |                 |                                                                                                                                                                           |                                                                                                                                                                                                                                                   |                                                                                                                                                                                                                                             |                                                                                                                                                                                                                                                                                                                                                                                                                         |        |   |
|------|-----------------|---------------------------------------------------------------------------------------------------------------------------------------------------------------------------|---------------------------------------------------------------------------------------------------------------------------------------------------------------------------------------------------------------------------------------------------|---------------------------------------------------------------------------------------------------------------------------------------------------------------------------------------------------------------------------------------------|-------------------------------------------------------------------------------------------------------------------------------------------------------------------------------------------------------------------------------------------------------------------------------------------------------------------------------------------------------------------------------------------------------------------------|--------|---|
| 2017 | Sadouki [213]   | Comparison of phenotypic and WGS-derived antimicrobial resistance profiles of <i>Shigella sonnei</i> isolated from cases of diarrhoeal disease in England and Wales, 2015 | <i>Shigella sonnei</i>                                                                                                                                                                                                                            | ampicillin, azithromycin, cefotaxime, ceftazidime, chloramphenicol, ciprofloxacin, gentamicin, streptomycin, sulphonamide, tetracycline and trimethoprim                                                                                    | Afghanistan, Bangladesh, Barbados, Bermuda, Cape verde, China, Colombia, Cuba, Dominican Republic, Egypt, France, Georgia, Ghana, Guatemala, India, Indonesia, Kenya, Lebanon, Malawi, Mali, Mexico, Morocco, Nepal, Pakistan, Peru, Philippines, Saudi Arabia, Somalia, Sudan, Tanzania, Thailand, Turkey, USA, Uzbekistan, Vietnam, Sub-Saharan Africa, Central America, North America, South America and unspecified | UK     | C |
| 2017 | Samuelsen [216] | Molecular and epidemiological characterization of carbapenemase-producing Enterobacteriaceae in Norway, 2007 to 2014                                                      | <i>Citrobacter</i> spp., <i>Enterobacter cloacae</i> complex, <i>Escherichia coli</i> , <i>Klebsiella pneumoniae</i> , <i>Klebsiella quasipneumoniae</i> , <i>Klebsiella variicola</i> , <i>Proteus mirabilis</i> and <i>Providencia stuartii</i> | amikacin, aztreonam, cefotaxime, ceftazidime, cefuroxime, ciprofloxacin, colistin, ertapenem, fosfomycin, gentamicin, imipenem, mecillinam, meropenem, piperacillin/tazobactam, temocillin, tigecycline, TMP-SMZ, tobramycin and carbapenem | Brazil, Greece, India, Jamaica, Jordan, Morocco, Pakistan, Romania, Serbia, Spain, Sri Lanka, Syria, Thailand, Turkey, UAE, USA and unspecified                                                                                                                                                                                                                                                                         | Norway | B |

|      |                |                                                                                                                                                                                              |                                                                      |                                                                                                                                                                  |                                                                                                                                                                                            |                |   |
|------|----------------|----------------------------------------------------------------------------------------------------------------------------------------------------------------------------------------------|----------------------------------------------------------------------|------------------------------------------------------------------------------------------------------------------------------------------------------------------|--------------------------------------------------------------------------------------------------------------------------------------------------------------------------------------------|----------------|---|
| 2017 | Wielders [256] | Extended-spectrum $\beta$ -lactamase- and pAmpC-producing Enterobacteriaceae among the general population in a livestock-dense area                                                          | Escherichia coli and Klebsiella pneumoniae                           | beta-lactams                                                                                                                                                     | Australia, New Zealand, Turkey, North Africa, Sub-Saharan Africa, North America, Central America, South America, Central Asia, East Asia, South Asia, Southeast Asia, West Asia and Europe | Netherlands    | B |
| 2018 | Allyn [44]     | Medical evacuation from abroad of critically ill patients                                                                                                                                    | Citrobacter freundii, Enterococcus faecium and Klebsiella pneumoniae | imipenem, meropenem, vancomycin, beta-lactams and carbapenems                                                                                                    | Mauritius                                                                                                                                                                                  | Reunion Island | C |
| 2018 | Brown [62]     | CTX-M-65 extended-spectrum $\beta$ -lactamase-producing Salmonella enterica serotype Infantis, United States                                                                                 | Salmonella enterica serotype Infantis                                | ampicillin, cefoxitin, ceftiofur, ceftriaxone, chloramphenicol, ciprofloxacin, gentamicin, nalidixic acid, streptomycin, sulfisoxazole, tetracycline and TMP-SMZ | Ecuador and Peru                                                                                                                                                                           | USA            | B |
| 2018 | Espenhain [86] | Travel to Asia is a strong predictor for carriage of cephalosporin resistant E. coli and Klebsiella spp. but does not explain everything; Prevalence study at a Norwegian hospital 2014-2016 | Escherichia coli and Klebsiella pneumoniae                           | cefotaxime, ceftazidime, piperacillin-tazobactam, gentamicin, cephalosporins and/or fluoroquinolones                                                             | Thailand, Turkey, Pakistan, Africa, America, Asia and Europe                                                                                                                               | Norway         | B |



|      |                   |                                                                                                                                                                            |                                                             |                                                                                                                                                                                                                                                                                                                      |                                                                                                                                                                                                                                                                                 |         |   |
|------|-------------------|----------------------------------------------------------------------------------------------------------------------------------------------------------------------------|-------------------------------------------------------------|----------------------------------------------------------------------------------------------------------------------------------------------------------------------------------------------------------------------------------------------------------------------------------------------------------------------|---------------------------------------------------------------------------------------------------------------------------------------------------------------------------------------------------------------------------------------------------------------------------------|---------|---|
| 2018 | Espinal [87]      | First description of blaNDM-7 carried on an IncX4 plasmid in <i>Escherichia coli</i> ST679 isolated in Spain                                                               | <i>Escherichia coli</i> and <i>Staphylococcus aureus</i>    | amikacin, amoxicillin/clavulanic acid, ampicillin, aztreonam, cefepime, cefotaxime, ceftazidime, cefoxitin, ciprofloxacin, doripenem, ertapenem, gentamicin, imipenem, levofloxacin, meropenem, methicillin, nalidixic acid, piperacillin/tazobactam, tetracycline, ticarcillin, tobramycin, TMP-SMZ and carbapenems | Pakistan                                                                                                                                                                                                                                                                        | Spain   | B |
| 2018 | Fleateau [93]     | Prevalence and risk factors for extended-spectrum beta-lactamase-producing <i>Enterobacteriaceae</i> in French military and civilian travelers: A cross-sectional analysis | <i>Escherichia coli</i> and/or <i>Klebsiella pneumoniae</i> | beta-lactams                                                                                                                                                                                                                                                                                                         | Afghanistan, Australia, Cambodia, Cameroon, Canary Islands, Central African Republic, France, French Guyana, India, Israel, Ivory Coast, Lebanon, Mali, Mauritius, Saudi Arabia, Thailand, UAE, Vietnam, Africa, Central America, North America, South America, Asia and Europe | France  | B |
| 2018 | Hebbelstrup [112] | Characterization of diarrheagenic enteroaggregative <i>Escherichia coli</i> in Danish adults - Antibiotic treatment does not reduce duration of diarrhea                   | <i>Escherichia coli</i>                                     | ampicillin, azithromycin, cefotaxime, ceftazidime, chloramphenicol, ciprofloxacin, gentamycin, nalidixic acid, sulfamethoxazole, tetracycline and/or trimethoprim                                                                                                                                                    | Cuba, Egypt, Germany, India, Nepal, Tanzania, Thailand and/or Turkey                                                                                                                                                                                                            | Denmark | A |

|      |                |                                                                                                                                                                                                |                                                    |                                                                                                                                                                |                                                                                                                                      |        |   |
|------|----------------|------------------------------------------------------------------------------------------------------------------------------------------------------------------------------------------------|----------------------------------------------------|----------------------------------------------------------------------------------------------------------------------------------------------------------------|--------------------------------------------------------------------------------------------------------------------------------------|--------|---|
| 2018 | Islam [125]    | Intestinal carriage of third-generation cephalosporin-resistant and extended-spectrum $\beta$ -lactamase-producing Enterobacteriaceae in healthy US children                                   | Escherichia coli or Klebsiella pneumoniae          | cefepime, ciprofloxacin, gentamicin, meropenem, piperacillin/tazobactam, TMP-SMZ, beta-lactams and/or cephalosporines                                          | Mexico, Nepal, Dominican Republic and Vietnam                                                                                        | USA    | C |
| 2018 | Johansen [131] | Whole-genome sequencing and antimicrobial resistance in Brucella melitensis from a Norwegian perspective                                                                                       | Brucella melitensis                                | Rifampicin                                                                                                                                                     | Afghanistan, Ethiopia, Georgia, Iraq, Israel, Somalia and Turkey                                                                     | Norway | C |
| 2018 | Karp [136]     | Plasmid-mediated quinolone resistance in human non-typhoidal Salmonella infections: An emerging public health problem in the United States                                                     | Salmonella enterica spp. (Non-Typhoidal Serotypes) | ampicillin, azithromycin, ceftiofur, ceftriaxone, chloramphenicol, ciprofloxacin, gentamicin, kanamycin, streptomycin, sulfisoxazole, tetracycline and TMP-SMZ | Cambodia, China, Dominican Republic, Egypt, Ethiopia, Indonesia, Israel, Malaysia, Mexico, Philippines, Taiwan, Thailand and Vietnam | USA    | C |
| 2018 | Klemm [143]    | Emergence of an extensively drug-resistant Salmonella enterica serovar Typhi Clone harboring a promiscuous plasmid encoding resistance to fluoroquinolones and third-generation cephalosporins | Salmonella enterica serotype Typhi                 | ceftriaxone                                                                                                                                                    | Pakistan                                                                                                                             | UK     | C |

|      |                |                                                                                                                                                               |                                                                                                                                                                                                                                                               |                                                                                                                                                               |                                                                                                                                                                                                                                                                          |         |   |
|------|----------------|---------------------------------------------------------------------------------------------------------------------------------------------------------------|---------------------------------------------------------------------------------------------------------------------------------------------------------------------------------------------------------------------------------------------------------------|---------------------------------------------------------------------------------------------------------------------------------------------------------------|--------------------------------------------------------------------------------------------------------------------------------------------------------------------------------------------------------------------------------------------------------------------------|---------|---|
| 2018 | Knaapila [144] | Antibiotic susceptibility of intestinal <i>Escherichia coli</i> in men undergoing transrectal prostate biopsies: a prospective, registered, multicentre study | <i>Escherichia coli</i>                                                                                                                                                                                                                                       | fluoroquinolone                                                                                                                                               | Denmark, Estonia, Finland, Germany, Iceland, Japan, Latvia, Lithuania, Poland, Russia, Sweden, North Africa, Sub-Saharan Africa, North America, South America, Asia and/or Europe                                                                                        | Finland | C |
| 2018 | Kohler [146]   | Emergence of carbapenemase-producing Enterobacteriaceae, South-Central Ontario, Canada                                                                        | <i>Citrobacter</i> spp., <i>Enterobacter</i> spp., <i>Escherichia coli</i> , <i>Klebsiella pneumoniae</i> , <i>Morganella morganii</i> , <i>Serratia marcescens</i> , <i>Klebsiella oxytoca</i> , <i>Providencia rettgeri</i> and/or <i>Proteus mirabilis</i> | amikacin, ciprofloxacin, colistin, ertapenem, fosfomycin, gentamicin, imipenem, meropenem, nitrofurantoin, tigecyclin, tobramycin, TMP-SMZ and/or carbapenems | Austria, Bangladesh, Barbados, Bhutan, Brazil, China, Croatia, Dominican Republic, Egypt, France, Germany, Greece, India, Israel, Italy, Jamaica, Maldives, Nepal, Pakistan, Philippines, Portugal, Saudi Arabia, Spain, Sri Lanka, Thailand, Turkey, USA and/or Vietnam | Canada  | B |
| 2018 | Macaux [161]   | Extensively-drug-resistant bacteria carriers among overseas travellers: one-third had not been hospitalized previously                                        | <i>Acinetobacter baumannii</i> , <i>Citrobacter amaloniticus</i> , <i>Citrobacter freundii</i> , <i>Enterobacter cloacae</i> , <i>Enterococcus faecium</i> , <i>Escherichia coli</i> and/or <i>Klebsiella pneumoniae</i>                                      | vancomycin or carbapenems                                                                                                                                     | India, Morocco, USA, Sub-Saharan Africa, Southeast Asia, West Asia and Europe                                                                                                                                                                                            | France  | C |

|      |                |                                                                                                                                                  |                                                                               |                                                                                                                                                                                                                                                                                     |                                                                                                 |        |   |
|------|----------------|--------------------------------------------------------------------------------------------------------------------------------------------------|-------------------------------------------------------------------------------|-------------------------------------------------------------------------------------------------------------------------------------------------------------------------------------------------------------------------------------------------------------------------------------|-------------------------------------------------------------------------------------------------|--------|---|
| 2018 | Mataseje [163] | Characterization of OXA-48-like carbapenemase producers in Canada, 2011-14                                                                       | Escherichia coli or Klebsiella pneumoniae                                     | amikacin, amoxicillin/clavulanic acid, ampicillin, cefazolin, cefotaxime, cefoxitin, cefpodoxime, ceftazidime, eftriaxone, ciprofloxacin, colistin, ertapenem, gentamicin, meropenem, nitrofurantoin, piperacillin/tazobactam, tigecycline, TMP-SMZ, tobramycin and/or beta-lactams | Egypt, Lebanon, Libya, Nigeria, Pakistan, Saudi Arabia, Syria, UAE, Ukraine, USA and South Asia | Canada | B |
| 2018 | Mittal [174]   | Two for the price of one: Emerging carbapenemases in a returning traveller to New York City                                                      | Klebsiella pneumoniae                                                         | amikacin, ampicillin, ampicillin-sulbactam, aztreonam, cefazolin, cefoxitin, ceftriaxone, cefepime, ceftazidime-avibactam, chloramphenicol, ciprofloxacin, gentamicin, meropenem, meropenem-vaborbactam, piperacillin/tazobactam, polymyxin B, tigecycline, tobramycin and TMP-SMZ  | Bangladesh                                                                                      | USA    | C |
| 2018 | Mulvey [176]   | Characterization of a colistin-resistant Salmonella enterica 4, [5],12: I: - Harboring mcr-3.2 on a variant IncHI-2 plasmid identified in Canada | Salmonella enterica serotype 4,[5],12:i:-                                     | aztreonam, cefotaxime, ceftazidime, cefepime, chloramphenicol, ciprofloxacin, colistin, gentamicin, kanamycin, polymyxin B, tetracycline and TMP-SMZ                                                                                                                                | Thailand                                                                                        | Canada | B |
| 2018 | Pommelet [199] | Enteric fever among children: 50 cases in a French tertiary care centre                                                                          | Salmonella enterica serotype Typhi and Salmonella enterica serotype Paratyphi | ampicillin, ciprofloxacin chloramphenicol, nalidixic acid and TMP-SMZ                                                                                                                                                                                                               | Bangladesh, Cameroon, India and Pakistan                                                        | France | C |

|      |                |                                                                                                                                            |                                                                                     |                                                                                                                                                                                                                           |                                                                                                                                                                                                                                                                       |         |   |
|------|----------------|--------------------------------------------------------------------------------------------------------------------------------------------|-------------------------------------------------------------------------------------|---------------------------------------------------------------------------------------------------------------------------------------------------------------------------------------------------------------------------|-----------------------------------------------------------------------------------------------------------------------------------------------------------------------------------------------------------------------------------------------------------------------|---------|---|
| 2018 | Terry [239]    | Antimicrobial resistance profiles of <i>Shigella dysenteriae</i> isolated from travellers returning to the UK, 2004-2017                   | <i>Shigella dysenteriae</i>                                                         | ciprofloxacin, chloramphenicol, streptomycin, tetracycline, trimethoprim, beta-lactams and sulphonamides                                                                                                                  | Afghanistan, Bangladesh, Cape verde, Congo, Egypt, Ethiopia, Gambia, Ghana, India, Iraq, Kenya, Malawi, Morocco, Nepal, Nigeria, Pakistan, Panama, Somalia, South Africa, Sudan, Tanzania, Turkey, United Arab Emirates, Zimbabwe, Sub-Saharan Africa and unspecified | UK      | B |
| 2018 | Ukah [243]     | Risk factors for acquisition of multidrug-resistant <i>Escherichia coli</i> and development of community-acquired urinary tract infections | <i>Escherichia coli</i>                                                             | amoxicillin/clavulanic acid, ampicillin, azithromycin, cefoxitin, ceftiofur, ceftriaxone, chloramphenicol, ciprofloxacin, gentamicin, kanamycin, nalidixic acid, streptomycin, sulfisoxazole, tetracycline and/or TMP-SMZ | Asia and unspecified                                                                                                                                                                                                                                                  | Canada  | B |
| 2018 | Valentin [244] | <i>Proteus mirabilis</i> harboring carbapenemase NDM-5 and ESBL VEB-6 detected in Austria                                                  | <i>Escherichia coli</i> , <i>Klebsiella pneumoniae</i> and <i>Proteus mirabilis</i> | ceftazidim/avibactam, ceftolozan/tazobactam, colistin, fosfomycin, meropenem, piperacillin/tazobactam and tigecycline                                                                                                     | Bangladesh                                                                                                                                                                                                                                                            | Austria | B |

|      |                       |                                                                                                                                                                |                                                                                                   |                                                                                                                                                               |                                                                                                           |                                                               |   |
|------|-----------------------|----------------------------------------------------------------------------------------------------------------------------------------------------------------|---------------------------------------------------------------------------------------------------|---------------------------------------------------------------------------------------------------------------------------------------------------------------|-----------------------------------------------------------------------------------------------------------|---------------------------------------------------------------|---|
| 2018 | Walker [253]          | A cluster of multidrug-resistant Mycobacterium tuberculosis among patients arriving in Europe from the Horn of Africa: A molecular epidemiological study       | Mycobacterium tuberculosis                                                                        | capreomycin, ethambutol, isoniazid, pyrazinamide and rifampicin                                                                                               | Djibouti, Eritrea, Ethiopia and Somalia and Sudan                                                         | Austria, Finland, France, Germany, Sweden, Switzerland and UK | B |
| 2018 | Williams [257]        | A case of multi-drug resistant ESBL-producing Shigella sonnei acute acalculous cholecystitis and gastroenteritis in a returned traveller                       | Shigella sonnei                                                                                   | amoxicillin, azithromycin, ceftriaxone, TMP-SMZ and beta-lactams                                                                                              | Malaysia and Vietnam                                                                                      | Australia                                                     | B |
| 2018 | Williamson [258]      | Increasing antimicrobial resistance in nontyphoidal Salmonella Isolates in Australia from 1979 to 2015                                                         | Salmonella enterica spp. (Non-Typhoidal Serotypes)                                                | ampicillin, cefotaxime, chloramphenicol, ciprofloxacin, gentamicin, kanamycin, nalidixic acid, streptomycin, sulphathiazole, tetracycline and/or trimethoprim | Indonesia, Malaysia, Thailand, Vietnam and unspecified                                                    | Australia                                                     | C |
| 2019 | Boyd [61]             | Results from the Canadian nosocomial infection surveillance program for detection of carbapenemase-producing Acinetobacter spp. in Canadian hospitals, 2010-16 | Acinetobacter baumannii, Acinetobacter bereziniae, Acinetobacter pittii and/or Acinetobacter soli | amikacin, ceftazidime, ceftriaxone, ciprofloxacin, colistin, gentamicin, meropenem, piperacillin/tazobactam, tigecycline, tobramycin, TMP-SMZ                 | China, South Korea, North Africa, Sub-Saharan Africa, South Asia, Central America, Europe and unspecified | Canada                                                        | C |
| 2019 | Chatham-Stephens [69] | Emergence of extensively drug-resistant Salmonella Typhi infections among travelers to or from Pakistan - United States, 2016-2018                             | Salmonella enterica serotype Typhi                                                                | ampicillin, chloramphenicol, TMP-SMZ, cephalosporins and fluoroquinolones                                                                                     | Pakistan                                                                                                  | USA                                                           | A |

|      |                |                                                                                                                                                                             |                                                         |                                                                                         |                                     |                   |   |
|------|----------------|-----------------------------------------------------------------------------------------------------------------------------------------------------------------------------|---------------------------------------------------------|-----------------------------------------------------------------------------------------|-------------------------------------|-------------------|---|
| 2019 | Dall [74]      | Do probiotics prevent colonization with multi-resistant Enterobacteriaceae during travel? A randomized controlled trial                                                     | Enterobacteriaceae                                      | carbapenems and/or beta-lactams                                                         | Denmark and India                   | Denmark and India | B |
| 2019 | Engsbro [84]   | Ceftriaxone-resistant Salmonella enterica serotype Typhi in a pregnant traveller returning from Karachi, Pakistan to Denmark, 2019                                          | Escherichia coli and Salmonella enterica serotype Typhi | ampicillin, aztreonam, cefpodoxime, ceftriaxone, ciprofloxacin, TMP-SMZ and carbapenems | Pakistan                            | Denmark           | B |
| 2019 | Eyre [89]      | Detection in the United Kingdom of the Neisseria gonorrhoeae FC428 clone, with ceftriaxone resistance and intermediate resistance to azithromycin, October to December 2018 | Neisseria gonorrhoeae                                   | azithromycin, cefixime, ceftriaxone, ciprofloxacin, penicillin and tetracycline         | Spain                               | UK                | C |
| 2019 | Haley [104]    | Salmonella enterica serovar Kentucky recovered from human clinical cases in Maryland, USA (2011–2015)                                                                       | Salmonella enterica serovar Kentucky                    | aminoglycosides, beta-lactams and sulfonamides                                          | North Africa, South Asia and Europe | USA               | C |
| 2019 | Hanrahan [105] | Emergence and spread of ciprofloxacin-resistant Neisseria gonorrhoeae in New South Wales, Australia: lessons from history                                                   | Neisseria gonorrhoeae                                   | ciprofloxacin                                                                           | Asia and unspecified                | Australia         | B |

|      |                 |                                                                                                                                                                                                                                  |                                       |                                                                                                           |                                                                                                                                                                                                                    |               |   |
|------|-----------------|----------------------------------------------------------------------------------------------------------------------------------------------------------------------------------------------------------------------------------|---------------------------------------|-----------------------------------------------------------------------------------------------------------|--------------------------------------------------------------------------------------------------------------------------------------------------------------------------------------------------------------------|---------------|---|
| 2019 | Huang [118]     | Methicillin-resistant Staphylococcus aureus nasal carriage in international medical conference attendees                                                                                                                         | Staphylococcus aureus                 | methicillin                                                                                               | Australia, Bangladesh, Canada, China, Denmark, France, Hong Kong, India, Indonesia, Iraq, Japan, Korea, Malaysia, Mauritius, Philippines, Saudi Arabia, Singapore, Sri Lanka, Swiss, Thailand, UK, USA and Vietnam | Taiwan        | A |
| 2019 | Huynh [122]     | Multidrug-resistant tuberculous meningitis in a returned traveller                                                                                                                                                               | Mycobacterium tuberculosis            | rifampicin                                                                                                | Pakistan                                                                                                                                                                                                           | Australia     | C |
| 2019 | Ingle [123]     | Co-circulation of multidrug-resistant Shigella among men who have sex with men, Australia                                                                                                                                        | Shigella flexneri and Shigella sonnei | ampicillin, azithromycin, ceftriaxone, ciprofloxacin, gentamicin, sulfonamide and trimethoprim            | North Africa, Sub-Saharan Africa, North Asia, South Asia, Southeast Asia, West Asia, Americas, Europe, Oceania and unspecified                                                                                     | Australia     | C |
| 2019 | Klein [142]     | Increase in the prevalence of Panton-Valentine leukocidin and clonal shift in community-onset methicillin-resistant Staphylococcus aureus causing skin and soft-tissue infections in the Rhine-Neckar Region, Germany, 2012-2016 | Staphylococcus aureus                 | clindamycin, fusidic acid, methicillin, mupirocin, tetracycline, TMP-SMZ, fluoroquinolones and macrolides | unspecified                                                                                                                                                                                                        | Germany       | C |
| 2019 | Langelier [151] | Microbiome and Antimicrobial Resistance Gene Dynamics in International Travelers                                                                                                                                                 | Escherichia coli                      | beta-lactam                                                                                               | Nepal, Nigeria, Uganda and USA                                                                                                                                                                                     | Nepal and USA | B |



|      |                    |                                                                                                                                                                               |                                                                                                                                                                                                                                                                            |                                                                     |                                                                                                                                                                                                                                                     |                                      |   |
|------|--------------------|-------------------------------------------------------------------------------------------------------------------------------------------------------------------------------|----------------------------------------------------------------------------------------------------------------------------------------------------------------------------------------------------------------------------------------------------------------------------|---------------------------------------------------------------------|-----------------------------------------------------------------------------------------------------------------------------------------------------------------------------------------------------------------------------------------------------|--------------------------------------|---|
| 2019 | Nurjadi [23]       | Import of community-associated, methicillin-resistant <i>Staphylococcus aureus</i> to Europe through skin and soft-tissue infection in intercontinental travellers, 2011-2016 | <i>Staphylococcus aureus</i>                                                                                                                                                                                                                                               | methicillin                                                         | Australia, North Africa, Sub-Saharan Africa, South Asia, Southeast Asia, West Asia, Central America, South America and Oceania                                                                                                                      | Europe                               | C |
| 2019 | Pires [197]        | Gut microbiota dynamics in travelers returning from India colonized with extended-spectrum cephalosporin-resistant Enterobacteriaceae: A longitudinal study                   | Enterobacteriaceae                                                                                                                                                                                                                                                         | beta-lactams                                                        | India and Switzerland                                                                                                                                                                                                                               | India and Switzerland                | B |
| 2019 | Schaumburg [217] + | Acquisition and colonization dynamics of antimicrobial-resistant bacteria during international travel: a prospective cohort study                                             | Enteric Bacteria (includes <i>Aeromonas caviae</i> , <i>Aeromonas hydrophila</i> , <i>Aeromonas sobria</i> , <i>Aeromonas veronii</i> , <i>Comamonas testosteroni</i> , <i>Enterobacter cloacae</i> complex, <i>Escherichia coli</i> , <i>Raoultella ornithinolytica</i> ) | colistin, beta-lactams and carbapenems                              | Bolivia, Brazil, Cambodia, China, Costa Rica, Dominican Republic, Egypt, Ecuador, Germany, India, Indonesia, Myanmar, Nepal, Netherlands, Panama, Peru, Rwanda, Singapore, Thailand, Vietnam, Africa, Asia, North America, South America and Europe | Germany, Netherlands and unspecified | C |
| 2019 | Siira [225]        | Whole genome sequencing of <i>Salmonella</i> Chester reveals geographically distinct clusters, Norway, 2000 to 2016                                                           | <i>Salmonella enterica</i> serovar Chester                                                                                                                                                                                                                                 | chloramphenicol, tetracycline, TMP-SMZ, beta-lactams and quinolones | Cyprus, Greece, Ivory Coast, Morocco, Senegal, Sri Lanka and Thailand                                                                                                                                                                               | Norway                               | B |

|      |                   |                                                                                                                                           |                                                                                                        |                                                          |                                                                |         |   |
|------|-------------------|-------------------------------------------------------------------------------------------------------------------------------------------|--------------------------------------------------------------------------------------------------------|----------------------------------------------------------|----------------------------------------------------------------|---------|---|
| 2019 | Skjøt-Arkil [227] | Carrier prevalence and risk factors for colonisation of multiresistant bacteria in Danish emergency departments: a cross-sectional survey | Enterobacter cloacae, Escherichia coli, Citrobacter spp., Klebsiella spp. and/or Staphylococcus aureus | methicillin, vancomycin, beta-lactams and/or carbapenams | Africa, North America, South America, Asia, Europe and Oceania | Denmark | C |
|------|-------------------|-------------------------------------------------------------------------------------------------------------------------------------------|--------------------------------------------------------------------------------------------------------|----------------------------------------------------------|----------------------------------------------------------------|---------|---|

<sup>#</sup>, Grade A was given to randomised control trials or for scoring 75% or above (in reference to the maximum score) on a Newcastle-Ottawa Scale based or adapted assessment protocol, grade B for 50-74%, and C was for less than 50%; <sup>+</sup>, studies containing antimicrobial resistant isolates pre- or before travel; <sup>\*</sup>, studies containing antimicrobial resistant organisms isolated during travelling; TMP-SMZ, trimethoprim/sulfamethoxazole; MDR, multidrug resistance: including studies that mentioned multidrug resistant organisms; USA, United States of America; UK, United Kingdom; UAE, United Arab Emirates.

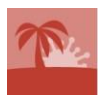

**Table S2.** List of Countries or regions that are documented in the review.

| Countries/regions mentioned in literature | Categorized as     |
|-------------------------------------------|--------------------|
| Angola                                    | Sub-Saharan Africa |
| Benin                                     |                    |
| Botswana                                  |                    |
| Burkina Faso                              |                    |
| Burundi                                   |                    |
| Cameroon                                  |                    |
| Cape Verde                                |                    |
| Central Africa                            |                    |
| Central African Republic                  |                    |
| Comoros                                   |                    |
| Congo                                     |                    |
| Democratic Republic of the Congo          |                    |
| Equatorial Guinea                         |                    |
| Eritrea                                   |                    |
| Ethiopia                                  |                    |
| French Guiana                             |                    |
| Gabon                                     |                    |
| Gambia                                    |                    |
| Ghana                                     |                    |
| Guinea                                    |                    |
| Guinea-Bissau                             |                    |
| Ivory Coast / Côte d'Ivoire               |                    |
| Kenya                                     |                    |
| Liberia                                   |                    |
| Madagascar                                |                    |
| Malawi                                    |                    |
| Mali                                      |                    |
| Mauritius                                 |                    |
| Mozambique                                |                    |
| Niger                                     |                    |
| Nigeria                                   |                    |
| Republic of the Congo                     |                    |
| Reunion Island                            |                    |
| Rwanda                                    |                    |
| Senegal                                   |                    |
| Seychelles                                |                    |
| Sierra Leone                              |                    |
| Somalia                                   |                    |
| South Sudan                               |                    |
| Tanzania                                  |                    |
| Togo                                      |                    |
| Uganda                                    |                    |
| Zambia                                    |                    |
| Zimbabwe                                  |                    |
| Africa                                    |                    |
| East Africa / Eastern Africa              |                    |

|                                      |                            |
|--------------------------------------|----------------------------|
| Middle Africa                        |                            |
| Sahara                               |                            |
| South Africa / Southern Africa       |                            |
| Sub-Saharan Africa                   |                            |
| West Africa                          |                            |
| Algeria                              | West Asia and North Africa |
| Cyprus                               |                            |
| Egypt                                |                            |
| Iran                                 |                            |
| Iraq                                 |                            |
| Israel                               |                            |
| Jordan                               |                            |
| Kuwait                               |                            |
| Lebanon                              |                            |
| Maghreb / Morocco                    |                            |
| Saudi Arabia                         |                            |
| Sudan                                |                            |
| Syria                                |                            |
| Tunisia                              |                            |
| Turkey                               |                            |
| UAE / United Arab Emirates           |                            |
| Arab countries                       |                            |
| Dead Sea                             |                            |
| Middle East                          |                            |
| North Africa                         |                            |
| Western Asia                         |                            |
| Kurdistan                            | Central Asia               |
| Uzbekistan                           |                            |
| Central Asia                         |                            |
| China                                | East Asia                  |
| Hong Kong                            |                            |
| Japan                                |                            |
| Mongolia                             |                            |
| North Korea                          |                            |
| South Korea                          |                            |
| Taiwan                               |                            |
| East Asia                            |                            |
| Far East Asia                        |                            |
| Russia                               | North Asia                 |
| Afghanistan                          |                            |
| Bangladesh                           | South Asia                 |
| Bhutan                               |                            |
| India                                |                            |
| Maldives                             |                            |
| Myanmar                              |                            |
| Nepal                                |                            |
| Pakistan                             |                            |
| Sri Lanka                            |                            |
| Indian peninsula/Indian subcontinent |                            |
| South Asia/Southern Asia             |                            |

|                        |  |                           |
|------------------------|--|---------------------------|
| Southern Central Asia  |  | Southeast Asia            |
| Brunei                 |  |                           |
| Cambodia               |  |                           |
| Indonesia              |  |                           |
| Laos                   |  |                           |
| Malaysia               |  |                           |
| Philippines            |  |                           |
| Singapore              |  |                           |
| Thailand               |  |                           |
| Vietnam                |  |                           |
| Southeast Asia         |  | Central and South America |
| Aruba                  |  |                           |
| Bahamas                |  |                           |
| Barbados               |  |                           |
| Belize                 |  |                           |
| Bolivia                |  |                           |
| Brazil                 |  |                           |
| Caribbean              |  |                           |
| Colombia               |  |                           |
| Costa Rica             |  |                           |
| Cuba                   |  |                           |
| Dominican Republic     |  |                           |
| Ecuador                |  |                           |
| El Salvador            |  |                           |
| Guadeloupe             |  |                           |
| Guatemala              |  |                           |
| Haiti                  |  |                           |
| Jamaica                |  |                           |
| Mexico                 |  |                           |
| Nicaragua              |  |                           |
| Panama                 |  |                           |
| Paraguay               |  |                           |
| Peru                   |  |                           |
| Suriname               |  |                           |
| Uruguay                |  |                           |
| Venezuela              |  |                           |
| Central America        |  |                           |
| Latin America          |  |                           |
| South America          |  |                           |
| Tropical South America |  |                           |
| Canada                 |  |                           |
| USA                    |  |                           |
| Bermuda                |  | Europe                    |
| Northern America       |  |                           |
| Austria                |  |                           |
| Belgium                |  |                           |
| Croatia                |  |                           |
| Czech Republic         |  |                           |
| Denmark                |  |                           |
| Estonia                |  |                           |

|                                                  |         |
|--------------------------------------------------|---------|
| Europe                                           |         |
| Finland                                          |         |
| France                                           |         |
| Georgia                                          |         |
| Germany                                          |         |
| Great Britain / England / UK                     |         |
| Greece                                           |         |
| Holland / Netherlands                            |         |
| Hungary                                          |         |
| Iceland                                          |         |
| Ireland                                          |         |
| Italy                                            |         |
| Macedonia                                        |         |
| Moldova                                          |         |
| Norway                                           |         |
| Poland                                           |         |
| Portugal                                         |         |
| Romania                                          |         |
| Serbia                                           |         |
| Spain                                            |         |
| Sweden                                           |         |
| Switzerland                                      |         |
| Ukraine                                          |         |
| Yugoslavia                                       |         |
| Nordic                                           |         |
| North-eastern Mediterranean                      |         |
| Australia                                        | Oceania |
| Hawaii                                           |         |
| New Guinea                                       |         |
| New Zealand                                      |         |
| Papua New Guinea                                 |         |
| Tahiti                                           |         |
| Antarctica                                       |         |
| Oceania                                          |         |
| Pacific (islands)                                |         |
| (Multiple categories or not mentioned/specified) | Other   |

12

**Table S3.** Top originating regions for AMR organisms (source).

| #  | Region                     | Isolates | Studies | ## | Top Locations | Isolates | Studies |
|----|----------------------------|----------|---------|----|---------------|----------|---------|
| 1  | South Asia                 | 6551     | 116     | 1  | India         | 3602     | 70      |
|    |                            |          |         | 2  | Pakistan      | 501      | 31      |
|    |                            |          |         | 3  | Nepal         | 580      | 15      |
| 2  | Southeast Asia             | 2243     | 77      | 1  | Thailand      | 1012     | 34      |
|    |                            |          |         | 2  | Philippines   | 173      | 18      |
|    |                            |          |         | 3  | Vietnam       | 215      | 17      |
| 3  | East Asia                  | 564      | 34      | 1  | China         | 109      | 21      |
|    |                            |          |         | 2  | Japan         | 4        | 3       |
|    |                            |          |         | 3  | Koreas        | 3        | 2       |
| 4  | North Africa and West Asia | 1368     | 81      | 1  | Egypt         | 292      | 28      |
|    |                            |          |         | 2  | Turkey        | 191      | 19      |
|    |                            |          |         | 3  | Morocco       | 181      | 16      |
| 5  | Sub-Saharan Africa         | 3082     | 96      | 1  | Kenya         | 1176     | 12      |
|    |                            |          |         | 2  | Tanzania      | 44       | 11      |
|    |                            |          |         | 3  | Nigeria       | 15       | 8       |
| 6  | Central and South America  | 3205     | 59      | 1  | Jamaica       | 363      | 4       |
|    |                            |          |         | 2  | Mexico        | 620      | 21      |
|    |                            |          |         | 3  | Brazil        | 47       | 9       |
| 7  | Europe                     | 2047     | 70      | 1  | Spain         | 386      | 21      |
|    |                            |          |         | 2  | Greece        | 96       | 13      |
|    |                            |          |         | 3  | UK            | 38       | 5       |
| 8  | North America              | 398      | 25      | 1  | USA           | 128      | 16      |
|    |                            |          |         | 2  | Canada        | 10       | 5       |
| 9  | Oceania                    | 58       | 13      | 1  | Australia     | 5        | 2       |
|    |                            |          |         | 2  | Tahiti        | 2        | 1       |
| 10 | Other *                    | 8520     | 63      | 1  | Unspecified   | 6138     | 48      |
|    |                            |          |         | 2  | Multiple      | 2382     | 18      |

13

\*, Travelling from multiple regions, or no mention of travel source; AMR, Antimicrobial resistant.

14

**Table S4.** Top destination regions for AMR organisms (destination).

| # | Region        | Isolates | Studies | ## | Top Locations | Isolates | Studies |
|---|---------------|----------|---------|----|---------------|----------|---------|
| 1 | Europe        | 15229    | 138     | 1  | UK            | 3656     | 22      |
|   |               |          |         | 2  | Spain         | 1993     | 17      |
|   |               |          |         | 3  | Finland       | 3382     | 10      |
| 2 | North America | 9261     | 57      | 1  | USA           | 5449     | 40      |
|   |               |          |         | 2  | Canada        | 3812     | 17      |
| 3 | Oceania       | 1650     | 11      | 1  | Australia     | 1650     | 11      |
| 4 | East Asia     | 461      | 18      | 1  | Japan         | 423      | 9       |
|   |               |          |         | 2  | South Korea   | 22       | 6       |
|   |               |          |         | 3  | Taiwan        | 14       | 2       |
| 5 | Other         | 2962     | 4       | 1  | Unspecified*  | 2472     | 3       |

15

\*, Travelling from multiple regions, or no mention of travel destination; AMR, Antimicrobial resistant.



16

**Table S5.** Number of studies and isolates for species that were documented in the analyzed studies.

| #     | Species                            | Number of documenting travelling AMR |          |
|-------|------------------------------------|--------------------------------------|----------|
|       |                                    | studies                              | isolates |
| 01    | Acinetobacter spp.*                | 21                                   | 187      |
| 02    | Aeromonas spp.*                    | 3                                    | 108      |
| 03    | Brucella melitensis                | 1                                    | 14       |
| 04    | Burkholderia pseudomallei          | 5                                    | 5        |
| 05    | Campylobacter spp.*                | 19                                   | 3281     |
| 06    | Citrobacter spp.*                  | 3                                    | 3        |
| 07    | Comamonas spp.                     | 1                                    | 1        |
| 08    | Corynebacterium diphtheriae        | 2                                    | 2        |
| 09    | Enterobacter spp.*                 | 9                                    | 49       |
| 10    | Enterococcus spp.*                 | 8                                    | 40       |
| 11    | Escherichia coli*                  | 59                                   | 5461     |
| 12    | Klebsiella spp.*                   | 28                                   | 207      |
| 13    | Lactococcus garvieae               | 1                                    | 1        |
| 14    | Morganella morganii*               | 1                                    | 1        |
| 15    | Mycobacterium spp.                 | 5                                    | 91       |
| 16    | Neisseria gonorrhoeae              | 3                                    | 120      |
| 17    | Plesiomonas spp.*                  | 2                                    | 39       |
| 18    | Proteus spp.*                      | 7                                    | 14       |
| 19    | Providencia spp.*                  | 2                                    | 2        |
| 20    | Pseudomonas spp. *                 | 12                                   | 44       |
| 21    | Raoultella ornithinolytica*        | 1                                    | 1        |
| 22    | Salmonella spp.*                   | 63                                   | 6032     |
| 23    | Shigella spp.*                     | 29                                   | 6931     |
| 24    | Staphylococcus aureus              | 35                                   | 2162     |
| 25    | Streptococcus pyogenes             | 1                                    | 1        |
| 26    | Vibrio spp.*                       | 3                                    | 5        |
| 27    | enteric bacteria (not specified) * | 29                                   | 5200     |
| 28    | Other organisms (not specified)    | 3                                    | 58       |
| Total |                                    |                                      | 30060    |

\*, enteric bacteria.

17

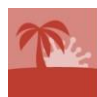

**Table S6.** Numbers of travel-related AMR isolates documented in 238 studies, up to June 2019 inclusive, categorized by source and isolation time.

| All organisms                        |                       | As          |           |           |           |                      | NAf&WAs     |           |           |           |       | SSAf        |           |           |           |       | Eu          |           |           |           |       | NAm         |           |           |           |       | S&CAm       |           |           |           |       | Oc          |           |           |           |       | Other |    |    |     |      |      |      |      |
|--------------------------------------|-----------------------|-------------|-----------|-----------|-----------|----------------------|-------------|-----------|-----------|-----------|-------|-------------|-----------|-----------|-----------|-------|-------------|-----------|-----------|-----------|-------|-------------|-----------|-----------|-----------|-------|-------------|-----------|-----------|-----------|-------|-------------|-----------|-----------|-----------|-------|-------|----|----|-----|------|------|------|------|
|                                      |                       | Before 1990 | 1990-1999 | 2000-2009 | 2010-2019 | Total                | Before 1990 | 1990-1999 | 2000-2009 | 2010-2019 | Total | Before 1990 | 1990-1999 | 2000-2009 | 2010-2019 | Total | Before 1990 | 1990-1999 | 2000-2009 | 2010-2019 | Total | Before 1990 | 1990-1999 | 2000-2009 | 2010-2019 | Total | Before 1990 | 1990-1999 | 2000-2009 | 2010-2019 | Total | Before 1990 | 1990-1999 | 2000-2009 | 2010-2019 | Total |       |    |    |     |      |      |      |      |
| Beta-lactams                         | Any AMR (30060)       | 16          | 2150      | 5943      | 1965      | 10799 <sub>a,b</sub> | 0           | 0         | 179       | 790       | 399   | 1368        | 0         | 0         | 1600      | 849   | 633         | 3082      | 0         | 0         | 451   | 1023        | 573       | 2047      | 25        | 0     | 326         | 47        | 398       | 354       | 716   | 2343        | 363       | 3776      | 0         | 0     | 41    | 17 | 58 | 679 | 1462 | 5373 | 1006 | 8520 |
|                                      | All (10474)           | 16          | 605       | 2187      | 1558      | 4366                 | 0           | 0         | 17        | 179       | 294   | 565         | 0         | 0         | 348       | 428   | 404         | 1180      | 0         | 0         | 171   | 543         | 471       | 1185      | 5         | 0     | 157         | 41        | 203       | 30        | 186   | 488         | 265       | 969       | 0         | 0     | 30    | 7  | 37 | 157 | 212  | 1061 | 539  | 1969 |
|                                      | Penicillins (6320)    | 16          | 564       | 1623      | 278       | 2481                 | 0           | 0         | 16        | 172       | 50    | 238         | 0         | 0         | 347       | 364   | 52          | 763       | 0         | 0         | 169   | 503         | 57        | 729       | 5         | 0     | 138         | 11        | 154       | 30        | 186   | 450         | 63        | 729       | 0         | 0     | 30    | 7  | 37 | 157 | 210  | 631  | 191  | 1189 |
|                                      | Carbapenems (1922)    | 0           | 249       | 266       | 276       | 791                  | 0           | 0         | 16        | 172       | 64    | 80          | 0         | 0         | 186       | 174   | 108         | 468       | 0         | 0         | 100   | 71          | 133       | 304       | 0         | 0     | 12          | 3         | 15        | 0         | 48    | 55          | 67        | 170       | 2         | 37    | 2     | 0  | 13 | 79  | 97   | 1189 |      |      |
|                                      | Cephalosporins (2100) | 0           | 291       | 420       | 231       | 942                  | 0           | 0         | 1         | 32        | 34    | 67          | 0         | 0         | 187       | 249   | 40          | 476       | 0         | 0         | 102   | 81          | 51        | 234       | 0         | 0     | 9           | 5         | 14        | 0         | 48    | 87          | 31        | 166       | 0         | 0     | 3     | 0  | 3  | 0   | 2    | 196  | 331  | 196  |
| Macrolides and Lincosamides (848)    |                       | 0           | 53        | 133       | 139       | 325                  | 0           | 0         | 4         | 1         | 2     | 7           | 0         | 0         | 5         | 4     | 30          | 39        | 0         | 0         | 1     | 5           | 15        | 21        | 0         | 0     | 1           | 6         | 7         | 0         | 7     | 88          | 18        | 113       | 0         | 0     | 1     | 4  | 5  | 15  | 60   | 134  | 122  | 331  |
| Quinolones (9213)                    |                       | 0           | 907       | 3241      | 447       | 4710 <sup>1</sup>    | 0           | 0         | 32        | 399       | 116   | 547         | 0         | 0         | 250       | 338   | 56          | 644       | 0         | 0         | 214   | 525         | 58        | 797       | 0         | 0     | 45          | 36        | 81        | 0         | 95    | 563         | 101       | 760       | 0         | 0     | 3     | 2  | 5  | 18  | 33   | 1236 | 382  | 1669 |
| Sulfonamides and Trimethoprim (7268) |                       | 16          | 721       | 1294      | 466       | 2499                 | 0           | 0         | 42        | 100       | 136   | 279         | 0         | 0         | 668       | 368   | 172         | 1208      | 0         | 0         | 236   | 84          | 40        | 360       | 8         | 0     | 104         | 31        | 143       | 113       | 251   | 588         | 97        | 1049      | 0         | 0     | 10    | 8  | 18 | 235 | 282  | 1034 | 10   | 1712 |
| Tetracyclines (5095)                 |                       | 0           | 683       | 551       | 206       | 1440                 | 0           | 0         | 36        | 79        | 66    | 181         | 0         | 0         | 597       | 269   | 84          | 951       | 0         | 0         | 207   | 75          | 16        | 298       | 6         | 0     | 38          | 5         | 49        | 78        | 232   | 571         | 46        | 927       | 0         | 0     | 1     | 1  | 2  | 110 | 344  | 678  | 115  | 1247 |
| Aminoglycosides (4200)               |                       | 0           | 533       | 549       | 561       | 1363                 | 0           | 0         | 14        | 52        | 113   | 179         | 0         | 0         | 412       | 250   | 107         | 769       | 0         | 0         | 102   | 92          | 30        | 224       | 5         | 0     | 78          | 31        | 114       | 84        | 129   | 259         | 58        | 530       | 0         | 0     | 3     | 2  | 5  | 174 | 219  | 493  | 130  | 1016 |
| Amphenicol (2633)                    |                       | 16          | 458       | 503       | 97        | 1074                 | 0           | 4         | 4         | 21        | 29    | 248         | 227       | 35        | 510       | 0     | 0           | 0         | 0         | 102       | 50    | 5           | 157       | 1         | 0         | 9     | 0           | 10        | 51        | 97        | 126   | 19          | 293       | 0         | 0         | 0     | 0     | 0  | 66 | 192 | 232  | 70   | 560  |      |

|                                          |    |     |     |     |                   |   |    |    |    |     |   |     |     |     |     |   |     |    |    |     |   |   |    |    |    |    |     |    |    |     |   |   |   |   |   |    |     |     |     |     |
|------------------------------------------|----|-----|-----|-----|-------------------|---|----|----|----|-----|---|-----|-----|-----|-----|---|-----|----|----|-----|---|---|----|----|----|----|-----|----|----|-----|---|---|---|---|---|----|-----|-----|-----|-----|
| Others, predefined or unspecified (1861) | 0  | 97  | 130 | 137 | 364               | 0 | 0  | 25 | 88 | 113 | 0 | 27  | 18  | 105 | 150 | 0 | 0   | 38 | 28 | 66  | 0 | 0 | 33 | 30 | 63 | 0  | 31  | 84 | 19 | 134 | 0 | 0 | 3 | 1 | 4 | 0  | 10  | 910 | 47  | 967 |
| MDR (4290)                               | 16 | 539 | 693 | 371 | 2229 <sup>2</sup> | 0 | 15 | 29 | 95 | 139 | 0 | 276 | 218 | 108 | 602 | 0 | 102 | 73 | 63 | 238 | 0 | 0 | 1  | 5  | 6  | 57 | 127 | 72 | 73 | 330 | 0 | 0 | 3 | 5 | 8 | 37 | 203 | 286 | 212 | 738 |

<sup>1</sup>, includes 115 isolates with a broad isolation time frame, 1984–2015; <sup>2</sup>, includes 610 isolates with a broad isolation time frame, 1984–2015; MDR, multidrug resistant organisms; organisms documented as multidrug resistant or resistant to three or more classes of antimicrobials; SSAf, Sub-Saharan Africa, includes isolates originated from Africa but not specified from which country or area; Naf&Was, West Asia and North Africa; As, Asia, includes isolates originated from Asia but not specified from which country or area, and does not include isolates documented specifically from West Asia; Eu: Europe; Nam, North America; S&Cam, Central and South America, includes isolates originated from Americas but not specified from which country or area; Oc, Oceania; Other, unspecified or multiple regions were documented.

**Table S7.** Number of travel-related isolates for enteric organisms with documented AMR component.

| Antimicrobial resistance component<br>(Number of isolates) |                       | As          |           |           |           |                   | NAf&WAs     |           |           |           |       | SSAf        |           |           |           |       | Eu          |           |           |           |       | NAm         |           |           |           |       | S&CAm       |           |           |           |       | Oc          |           |           |           |       | Other |      |      |      |      |      |
|------------------------------------------------------------|-----------------------|-------------|-----------|-----------|-----------|-------------------|-------------|-----------|-----------|-----------|-------|-------------|-----------|-----------|-----------|-------|-------------|-----------|-----------|-----------|-------|-------------|-----------|-----------|-----------|-------|-------------|-----------|-----------|-----------|-------|-------------|-----------|-----------|-----------|-------|-------|------|------|------|------|------|
|                                                            |                       | Before 1990 | 1990-1999 | 2000-2009 | 2010-2019 | Total             | Before 1990 | 1990-1999 | 2000-2009 | 2010-2019 | Total | Before 1990 | 1990-1999 | 2000-2009 | 2010-2019 | Total | Before 1990 | 1990-1999 | 2000-2009 | 2010-2019 | Total | Before 1990 | 1990-1999 | 2000-2009 | 2010-2019 | Total | Before 1990 | 1990-1999 | 2000-2009 | 2010-2019 | Total | Before 1990 | 1990-1999 | 2000-2009 | 2010-2019 | Total |       |      |      |      |      |      |
| Beta-lactams                                               | Any AMR (27593)       | 16          | 2042      | 5206      | 1734      | 9725a&b           | 0           | 179       | 647       | 369       | 1195  | 0           | 1600      | 789       | 426       | 2816  | 0           | 451       | 591       | 520       | 1562  | 25          | 0         | 236       | 42        | 303   | 354         | 716       | 2253      | 298       | 3623  | 0           | 0         | 14        | 10        | 24    | 679   | 1439 | 5331 | 896  | 8345 |      |
|                                                            | All (8587)            | 16          | 605       | 1450      | 1475      |                   | 3546        | 0         | 17        | 113       | 278   | 408         | 0         | 348       | 370       | 394   | 1112        | 0         | 171       | 112       | 442   | 725         | 5         | 0         | 67        | 36    | 108         | 30        | 186       | 399       | 232   | 847         | 0         | 0         | 3         | 5     | 8     | 157  | 212  | 1019 | 445  | 1833 |
|                                                            | Penicillins (5336)    | 16          | 566       | 1073      | 383       |                   | 2038        | 0         | 16        | 54        | 79    | 150         | 0         | 347       | 327       | 121   | 795         | 0         | 169       | 103       | 146   | 418         | 5         | 0         | 63        | 6     | 74          | 30        | 186       | 387       | 93    | 696         | 0         | 0         | 3         | 5     | 8     | 157  | 212  | 742  | 46   | 1157 |
|                                                            | Carbapenems (1454)    | 0           | 249       | 266       | 101       |                   | 616         | 0         | 0         | 16        | 29    | 45          | 0         | 186       | 174       | 12    | 372         | 0         | 100       | 71        | 46    | 217         | 0         | 0         | 12        | 2     | 14          | 0         | 48        | 55        | 17    | 120         | 0         | 0-        | 2         | 0     | 2     | 0    | 13   | 55   | 68   |      |
|                                                            | Cephalosporins (1848) | 0           | 290       | 390       | 153       |                   | 833         | 0         | 1         | 32        | 34    | 67          | 0         | 187       | 248       | 10    | 445         | 0         | 102       | 68        | 44    | 214         | 0         | 0         | 9         | 5     | 14          | 0         | 48        | 86        | 23    | 157         | 0         | 0         | 3         | 0     | 3     | 0    | 22   | 115  |      |      |
| Macrolides and Licosamides (493)                           |                       | 0           | 53        | 103       | 27        | 183               | 0           | 4         | 1         | 2         | 7     | 0           | 5         | 3         | 2         | 10    | 0           | 1         | 5         | 7         | 13    | 0           | 0         | 0         | 2         | 2     | 0           | 7         | 87        | 4         | 98    | 0           | 0         | 0         | 1         | 1     | 15    | 59   | 75   | 30   | 179  |      |
| Quinolones (8779)                                          |                       | 0           | 799       | 3211      | 330       | 4457 <sup>1</sup> | 0           | 32        | 399       | 108       | 539   | 0           | 250       | 337       | 21        | 608   | 0           | 214       | 525       | 47        | 786   | 0           | 0         | 45        | 32        | 77    | 0           | 95        | 563       | 90        | 749   | 0           | 0         | 3         | 0         | 3     | 18    | 22   | 1234 | 286  | 1560 |      |
| Sulfonamides and Trimethoprim (6848)                       |                       | 16          | 721       | 1264      | 321       | 2324              | 0           | 42        | 100       | 128       | 271   | 0           | 668       | 367       | 57        | 1092  | 0           | 236       | 84        | 22        | 342   | 8           | 0         | 104       | 30        | 142   | 133         | 251       | 587       | 82        | 1033  | 0           | 0         | 10        | 8         | 18    | 235   | 282  | 76   | 1626 |      |      |
| Tetracyclines (4799)                                       |                       | 0           | 683       | 520       | 110       | 1313              | 0           | 36        | 79        | 58        | 173   | 0           | 597       | 268       | 35        | 900   | 0           | 207       | 74        | 10        | 291   | 6           | 0         | 38        | 3         | 47    | 38          | 232       | 571       | 37        | 878   | 0           | 0         | 1         | 0         | 1     | 110   | 335  | 34   | 1156 |      |      |
| Aminoglycosides (3892)                                     |                       | 0           | 553       | 519       | 163       | 1235              | 0           | 14        | 52        | 103       | 169   | 0           | 412       | 249       | 48        | 710   | 0           | 102       | 92        | 23        | 217   | 5           | 0         | 78        | 30        | 113   | 84          | 129       | 258       | 52        | 523   | 0           | 0         | 4         | 0         | 4     | 174   | 207  | 492  | 48   | 921  |      |
| Amphenicol (2489)                                          |                       | 16          | 458       | 503       | 50        | 1027              | 0           | 4         | 4         | 21        | 29    | 0           | 248       | 227       | 11        | 486   | 0           | 102       | 50        | 3         | 155   | 1           | 0         | 9         | 0         | 10    | 51          | 97        | 126       | 17        | 291   | 0           | 0         | 0         | 0         | 0     | 66    | 192  | 232  | 1    | 491  |      |

| Others, predefined or unspecified<br>(3097) | 0  | 97  | 99  | 308 | 1114 <sup>2</sup> | 0 | 0  | 19 | 91 | 110 | 0 | 27  | 15  | 138 | 180 | 0 | 0   | 27 | 139 | 166 | 0 | 0 | 31 | 28 | 59 | 0  | 31  | 84 | 76 | 191 | 0 | 0 | 2 | 1 | 3  | 0   | 130 | 967 | 177 | 1274 |
|---------------------------------------------|----|-----|-----|-----|-------------------|---|----|----|----|-----|---|-----|-----|-----|-----|---|-----|----|-----|-----|---|---|----|----|----|----|-----|----|----|-----|---|---|---|---|----|-----|-----|-----|-----|------|
| MDR<br>(4083)                               | 16 | 539 | 662 | 313 | 2140 <sup>2</sup> | 0 | 15 | 29 | 86 | 130 | 0 | 276 | 217 | 73  | 566 | 0 | 102 | 72 | 29  | 203 | 0 | 0 | 0  | 5  | 5  | 57 | 127 | 71 | 68 | 323 | 0 | 0 | 4 | 6 | 37 | 194 | 285 | 194 | 710 |      |

<sup>1</sup>, includes 115 isolates with a broad isolation time frame, 1984–2015; <sup>2</sup>, includes 610 isolates with a broad isolation time frame, 1984–2015; MDR, multidrug resistant organisms; organisms documented as multidrug resistant or resistant to three or more classes of antimicrobials; SSaF, Sub-Saharan Africa, includes isolates originated from Africa but not specified from which country or area; Naf&Was, West Asia and North Africa; As, Asia, includes isolates originated from Asia but not specified from which country or area, and does not include isolates documented specifically from West Asia; Eu: Europe; Nam, North America; S&Cam, Central and South America, includes isolates originated from Americas but not specified from which country or area; Oc, Oceania; Other, unspecified or multiple regions were documented.



**Table S8.** Antimicrobials categories that were included in the analysis.

| Antimicrobial class           |                | Mentioned antimicrobial Name                                                                                                                                                                                                                                                         |                                           |
|-------------------------------|----------------|--------------------------------------------------------------------------------------------------------------------------------------------------------------------------------------------------------------------------------------------------------------------------------------|-------------------------------------------|
| beta-lactams                  | penicillins    | ampicillin/sulbactam, amoxicillin/clavulanate, flucloxacillin/oxacillin, isoxapenicillin, mecillinam, oxacillin, penicillin G, piperacillin/tazobactam, piperacillin, temocillin, ticarcillin, ticarcillin/clavulanic acid, and studies mentioning penicillins with no specification | and studies mentioning beta specification |
|                               | carbapenems    | biapenem, doripenem, ertapenem, imipenem, imipenem/cilastatin, meropenem-vaborbactam, meropenem, and studies mentioning carbapenems with no specification                                                                                                                            |                                           |
|                               | cephalosporins | cefepime, cefotaxime, cefoxitin, ceftazidime, ceftiofur, ceftriaxone, cefazolin, cefmetazole, cefalexin, cefuroxime axetil, cefaclor, cefepime/clavulanic acid, cefradine, cefpodoxime, cephalothin, and studies mentioning cephalosporins with no specification                     |                                           |
| macrolides and lincosamides   |                | azithromycin, clarithromycin, clindamycin, erythromycin, telithromycin, and studies mentioning macrolides and lincosamides with no specification                                                                                                                                     |                                           |
| quinolones                    |                | ciprofloxacin, denaldixic acid, enrofloxacin, levofloxacin, nalidixic acid, Norfloxacin, ofloxacin, pefloxacin, and studies mentioning quinolones with no specification                                                                                                              |                                           |
| sulfonamides and trimethoprim |                | trimethoprim, TMP-SMZ, sulfamethoxazole, sulfisoxazole, sulphathiazole, and studies mentioning sulfonamides with no specification                                                                                                                                                    |                                           |
| tetracyclines                 |                | doxycycline, tetracycline, tigecycline                                                                                                                                                                                                                                               |                                           |
| aminoglycosides               |                | amikacin, arbekacin, capreomycin, gentamicin, isepamicin, kanamycin, netilmicin, neomycin, streptomycin, spectinomycin, tobramycin, and studies mentioning aminoglycosides with no specification                                                                                     |                                           |
| amphenicol                    |                | chloramphenicol, florfenicol                                                                                                                                                                                                                                                         |                                           |
| Others/not classified         |                | aztreonam, colistin, ethambutol, fosfomycin, fosfomycin/trometamol, fucidic acid, furazolidone, isoniazid, linezolid, metronidazole, mupirocin, nitrofurantoin, oxazolidinones, polymyxin B, pyrazinamide, rifabutin, rifampicin, teicoplanin, vancomycin                            |                                           |

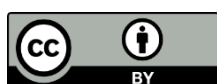

© 2021 by the authors. Submitted for possible open access publication under the terms and conditions of the Creative Commons Attribution (CC BY) license (<http://creativecommons.org/licenses/by/4.0/>).
